# Supplementary material for: High-Density Genetic Mapping with Interspecific Hybrids of Two Sea Urchins, Strongylocentrotus nudus and S. intermedius, by RAD Sequencing
Source: PLoS One. 2015 Sep 23;10(9):e0138585. doi: 10.1371/journal.pone.0138585 (PMC4580576; doi:10.1371/journal.pone.0138585)
Supplement: S3 Table — (XLSX) [file pone.0138585.s003.xlsx]

## Sheet: scaffolding
Table S3. Scaffolding information of sea urchin genome assembly using the genetic maps presented in this study.
SNP ID	Genetic position	Linkage group	Map Sources	RADSeqID	Purple sea urchin genome Scaffold ID	Scaffold Start	Scaffold End
101963	0.313	1	Female	Marker_101963	Scaffold849	378423	378457
86655	0.402	1	Female	Marker_86655	Scaffold162	176407	176367
306375	0.414	1	Female	Marker_306375	Scaffold623	276899	276931
136125	0.583	1	Female	Marker_136125	Scaffold1117	170564	170525
161609	0.846	1	Female	Marker_161609	Scaffold623	540278	540238
138196	0.976	1	Female	Marker_138196	Scaffold704	653795	653760
66772	1.471	1	Female	Marker_66772	Scaffold780	336454	336417
144111	1.476	1	Female	Marker_144111	Scaffold555	190155	190122
13178	1.483	1	Female	Marker_13178	Scaffold128	805843	805805
174407	1.522	1	Female	Marker_174407	Scaffold780	180287	180247
303670	1.551	1	Female	Marker_303670	Scaffold1643	122953	122993
289256	1.569	1	Female	Marker_289256	Scaffold780	51126	51086
169206	1.597	1	Female	Marker_169206	Scaffold780	192949	192983
91024	1.601	1	Female	Marker_91024	Scaffold108	87600	87637
106877	2.172	1	Female	Marker_106877	Scaffold2205	24962	24933
267810	2.218	1	Female	Marker_267810	Scaffold2900	18620	18660
267713	3.156	1	Female	Marker_267713	Scaffold69	326426	326460
250492	3.171	1	Female	Marker_250492	Scaffold2242	59465	59425
84422	3.232	1	Female	Marker_84422	Scaffold36	959629	959592
94455	5.657	1	Female	Marker_94455	Scaffold1610	70594	70632
106313	5.775	1	Female	Marker_106313	Scaffold2445	221183	221214
58491	6.419	1	Female	Marker_58491	Scaffold244	296090	296054
8514	6.993	1	Female	Marker_8514	Scaffold244	459055	459093
28355	7.115	1	Female	Marker_28355	Scaffold299	51175	51135
135119	7.116	1	Female	Marker_135119	Scaffold177	698392	698428
121933	7.119	1	Female	Marker_121933	Scaffold543	56374	56334
39173	7.121	1	Female	Marker_39173	Scaffold964	23901	23941
207775	7.141	1	Female	Marker_207775	Scaffold244	224308	224349
138245	7.179	1	Female	Marker_138245	Scaffold116	558276	558311
61369	7.181	1	Female	Marker_61369	Scaffold244	345036	344995
186913	7.189	1	Female	Marker_186913	Scaffold270	349999	349962
74074	7.231	1	Female	Marker_74074	Scaffold299	82985	83026
57344	7.608	1	Female	Marker_57344	Scaffold177	631439	631398
41993	10.829	1	Female	Marker_41993	Scaffold117	875862	875889
221257	11.378	1	Female	Marker_221257	Scaffold177	400964	401004
279035	11.393	1	Female	Marker_279035	Scaffold177	195418	195384
66282	11.577	1	Female	Marker_66282	Scaffold1641	267857	267892
166223	11.726	1	Female	Marker_166223	Scaffold117	779052	779092
64933	12.884	1	Female	Marker_64933	Scaffold1295	81682	81649
295450	12.919	1	Female	Marker_295450	Scaffold192	892041	892081
8200	13.038	1	Female	Marker_8200	Scaffold355	9477	9517
287670	13.051	1	Female	Marker_287670	Scaffold1618	17843	17805
225456	13.053	1	Female	Marker_225456	Scaffold192	755836	755873
273329	13.09	1	Female	Marker_273329	Scaffold192	763155	763122
77791	13.094	1	Female	Marker_77791	Scaffold30756	14877	14837
100114	13.27	1	Female	Marker_100114	Scaffold192	384256	384216
280736	14.012	1	Female	Marker_280736	Scaffold36	268100	268133
313239	14.555	1	Female	Marker_313239	Scaffold1163	127400	127360
227662	14.572	1	Female	Marker_227662	Scaffold720	251309	251347
94563	14.593	1	Female	Marker_94563	Scaffold720	227603	227563
215543	14.689	1	Female	Marker_215543	Scaffold3376	40189	40152
266387	14.697	1	Female	Marker_266387	Scaffold720	130937	130913
228966	14.792	1	Female	Marker_228966	Scaffold720	124558	124530
199564	14.872	1	Female	Marker_199564	Scaffold720	321345	321384
343074	14.876	1	Female	Marker_343074	Scaffold5044	2232	2197
97476	15.926	1	Female	Marker_97476	Scaffold190	120844	120803
139308	16.02	1	Female	Marker_139308	Scaffold190	118231	118191
96450	16.406	1	Female	Marker_96450	Scaffold190	170031	170068
152191	17.328	1	Female	Marker_152191	Scaffold2081	24419	24454
107977	17.633	1	Female	Marker_107977	Scaffold494	177435	177397
195824	17.676	1	Female	Marker_195824	Scaffold1148	106123	106084
81086	17.704	1	Female	Marker_81086	Scaffold494	177432	177472
25496	18.202	1	Female	Marker_25496	Scaffold1759	81555	81525
13065	18.7	1	Female	Marker_13065	Scaffold1697	109005	108969
316386	19.323	1	Female	Marker_316386	Scaffold159	567586	567613
104168	19.346	1	Female	Marker_104168	Scaffold489	849861	849821
104439	22.759	1	Female	Marker_104439	Scaffold1851	46177	46217
194926	29.597	1	Female	Marker_194926	Scaffold1789	62514	62548
311265	30.274	1	Female	Marker_311265	Scaffold30686	267	297
124963	30.695	1	Female	Marker_124963	Scaffold1514	15299	15265
252589	35.647	1	Female	Marker_252589	Scaffold390	5352	5313
279689	35.673	1	Female	Marker_279689	Scaffold888	39055	39095
129649	35.693	1	Female	Marker_129649	Scaffold1343	255976	256020
279490	38.632	1	Female	Marker_279490	Scaffold636	457480	457448
142026	38.693	1	Female	Marker_142026	Scaffold1019	199804	199767
101418	40.739	1	Female	Marker_101418	Scaffold636	249676	249638
192504	41.158	1	Female	Marker_192504	Scaffold1364	70958	70991
275777	41.565	1	Female	Marker_275777	Scaffold1848	3679	3639
197665	41.586	1	Female	Marker_197665	Scaffold632	384906	384936
72888	41.598	1	Female	Marker_72888	Scaffold1364	92724	92684
126642	41.608	1	Female	Marker_126642	Scaffold557	56479	56520
121969	41.61	1	Female	Marker_121969	Scaffold280	603610	603577
237953	41.617	1	Female	Marker_237953	Scaffold743	238965	238935
33305	44.914	1	Female	Marker_33305	Scaffold5	1326209	1326246
87709	45.129	1	Female	Marker_87709	Scaffold253	59967	59932
129858	45.586	1	Female	Marker_129858	Scaffold5	1646707	1646736
249624	45.596	1	Female	Marker_249624	Scaffold5	1597525	1597489
52952	45.651	1	Female	Marker_52952	Scaffold3058	4644	4611
105203	45.656	1	Female	Marker_105203	Scaffold144	576366	576388
169502	45.781	1	Female	Marker_169502	Scaffold5	1753751	1753711
77768	46.395	1	Female	Marker_77768	Scaffold213	674581	674616
18762	46.402	1	Female	Marker_18762	Scaffold374	652195	652154
85954	46.627	1	Female	Marker_85954	Scaffold896	266865	266903
100017	46.65	1	Female	Marker_100017	Scaffold993	225403	225362
42314	46.89	1	Female	Marker_42314	Scaffold1117	331131	331091
41996	46.91	1	Female	Marker_41996	Scaffold5734	30766	30745
265611	48.894	1	Female	Marker_265611	Scaffold451	408757	408795
109964	0	10	Female	Marker_109964	Scaffold153	664793	664762
264944	0.751	10	Female	Marker_264944	Scaffold946	514584	514558
148863	0.789	10	Female	Marker_148863	Scaffold946	43300	43339
250167	0.79	10	Female	Marker_250167	Scaffold2000	77876	77836
264268	1.07	10	Female	Marker_264268	Scaffold946	486214	486250
107557	1.515	10	Female	Marker_107557	Scaffold326	351799	351759
310970	1.74	10	Female	Marker_310970	Scaffold13056	1234	1197
268005	1.971	10	Female	Marker_268005	Scaffold326	648245	648285
195457	2.257	10	Female	Marker_195457	Scaffold326	351796	351833
238773	2.392	10	Female	Marker_238773	Scaffold326	519491	519518
204246	2.582	10	Female	Marker_204246	Scaffold326	400501	400527
31202	2.714	10	Female	Marker_31202	Scaffold326	696534	696574
110799	6.759	10	Female	Marker_110799	Scaffold890	152220	152183
261589	6.786	10	Female	Marker_261589	Scaffold55	591991	591964
126756	7.009	10	Female	Marker_126756	Scaffold55	669151	669182
251477	7.071	10	Female	Marker_251477	Scaffold55	547491	547531
262660	7.093	10	Female	Marker_262660	Scaffold55	913410	913370
18120	7.132	10	Female	Marker_18120	Scaffold333	642682	642642
145460	7.149	10	Female	Marker_145460	Scaffold333	711416	711457
43702	7.191	10	Female	Marker_43702	Scaffold326	30143	30176
200899	7.227	10	Female	Marker_200899	Scaffold333	710863	710837
289582	7.36	10	Female	Marker_289582	Scaffold55	654660	654699
15691	7.442	10	Female	Marker_15691	Scaffold55	254062	254100
46723	7.554	10	Female	Marker_46723	Scaffold5038	42787	42747
211369	7.59	10	Female	Marker_211369	Scaffold2165	102458	102497
84590	7.962	10	Female	Marker_84590	Scaffold55	1095926	1095963
226869	8.647	10	Female	Marker_226869	Scaffold8963	760	782
131439	8.655	10	Female	Marker_131439	Scaffold2077	177586	177550
69540	8.742	10	Female	Marker_69540	Scaffold2858	10697	10663
337140	8.865	10	Female	Marker_337140	Scaffold7	1609012	1609052
177505	8.96	10	Female	Marker_177505	Scaffold7	1770967	1771007
136247	8.999	10	Female	Marker_136247	Scaffold7	1697357	1697316
99216	9.004	10	Female	Marker_99216	Scaffold3151	38372	38393
192072	9.004	10	Female	Marker_192072	Scaffold7	1887180	1887140
158460	9.472	10	Female	Marker_158460	Scaffold19091	442	471
71355	10.01	10	Female	Marker_71355	Scaffold455	297106	297078
47396	10.037	10	Female	Marker_47396	Scaffold231	252778	252738
280996	10.083	10	Female	Marker_280996	Scaffold455	101050	101015
63964	10.089	10	Female	Marker_63964	Scaffold80	54969	55001
260668	10.137	10	Female	Marker_260668	Scaffold455	126941	126978
304690	10.141	10	Female	Marker_304690	Scaffold455	126944	126904
254207	10.23	10	Female	Marker_254207	Scaffold231	342405	342363
93515	13.586	10	Female	Marker_93515	Scaffold945	207980	207940
229445	14.175	10	Female	Marker_229445	Scaffold1169	33391	33359
111595	14.179	10	Female	Marker_111595	Scaffold3578	20211	20181
155289	14.404	10	Female	Marker_155289	Scaffold1165	123070	123030
186635	14.526	10	Female	Marker_186635	Scaffold2194	1156	1120
212754	14.751	10	Female	Marker_212754	Scaffold945	103667	103697
43311	16.082	10	Female	Marker_43311	Scaffold404	324744	324782
254531	16.423	10	Female	Marker_254531	Scaffold1275	231989	232010
7298	16.557	10	Female	Marker_7298	Scaffold1275	80299	80259
68393	16.557	10	Female	Marker_68393	Scaffold1650	137297	137337
269274	16.695	10	Female	Marker_269274	Scaffold501	167803	167842
173491	16.874	10	Female	Marker_173491	Scaffold404	313551	313511
225425	17.034	10	Female	Marker_225425	Scaffold2670	16184	16148
167462	17.06	10	Female	Marker_167462	Scaffold404	133659	133632
214319	17.092	10	Female	Marker_214319	Scaffold68	309933	309968
309211	17.396	10	Female	Marker_309211	Scaffold501	567106	567145
276189	17.43	10	Female	Marker_276189	Scaffold8861	1440	1419
175814	17.679	10	Female	Marker_175814	Scaffold501	552523	552550
170759	17.736	10	Female	Marker_170759	Scaffold30532	3620	3593
4569	17.741	10	Female	Marker_4569	Scaffold1275	174255	174215
291483	18.059	10	Female	Marker_291483	Scaffold1891	42990	43030
282482	20.803	10	Female	Marker_282482	Scaffold68	557176	557150
184370	21.152	10	Female	Marker_184370	Scaffold633	209096	209056
128212	21.154	10	Female	Marker_128212	Scaffold68	556774	556810
14583	21.631	10	Female	Marker_14583	Scaffold1165	277240	277271
83691	23.062	10	Female	Marker_83691	Scaffold68	1334319	1334281
64411	23.112	10	Female	Marker_64411	Scaffold277	79165	79197
54315	23.209	10	Female	Marker_54315	Scaffold68	1228431	1228403
213820	23.341	10	Female	Marker_213820	Scaffold608	288117	288079
9682	23.553	10	Female	Marker_9682	Scaffold277	249850	249888
238185	24.27	10	Female	Marker_238185	Scaffold68	1303952	1303921
209430	26.286	10	Female	Marker_209430	Scaffold357	204589	204617
170949	26.612	10	Female	Marker_170949	Scaffold48	928773	928733
7976	26.864	10	Female	Marker_7976	Scaffold1585	84376	84416
39400	27.344	10	Female	Marker_39400	Scaffold48	961615	961655
142830	27.573	10	Female	Marker_142830	Scaffold3699	1142	1166
301880	27.841	10	Female	Marker_301880	Scaffold218	543417	543442
144659	32.317	10	Female	Marker_144659	Scaffold3023	30942	30910
60192	33.171	10	Female	Marker_60192	Scaffold892	179487	179527
45361	33.614	10	Female	Marker_45361	Scaffold279	277555	277599
215135	33.769	10	Female	Marker_215135	Scaffold231	569328	569367
45431	33.769	10	Female	Marker_45431	Scaffold86	791990	791950
235742	33.888	10	Female	Marker_235742	Scaffold279	277558	277517
83547	33.918	10	Female	Marker_83547	Scaffold1378	80615	80655
84188	34.031	10	Female	Marker_84188	Scaffold649	264394	264354
98572	34.197	10	Female	Marker_98572	Scaffold279	402469	402442
225438	34.643	10	Female	Marker_225438	Scaffold86	1040517	1040547
117989	35.103	10	Female	Marker_117989	Scaffold279	395376	395415
144613	36.082	10	Female	Marker_144613	Scaffold2120	24962	24925
136896	37.748	10	Female	Marker_136896	Scaffold1213	42630	42590
179905	37.858	10	Female	Marker_179905	Scaffold3077	22633	22673
236733	37.931	10	Female	Marker_236733	Scaffold2501	101790	101825
235980	38.262	10	Female	Marker_235980	Scaffold198	713587	713547
175050	38.48	10	Female	Marker_175050	Scaffold1918	63133	63171
171946	39.115	10	Female	Marker_171946	Scaffold29850	839	799
110897	48.648	10	Female	Marker_110897	Scaffold638	189976	190000
82435	48.667	10	Female	Marker_82435	Scaffold198	114342	114307
126845	48.966	10	Female	Marker_126845	Scaffold3050	31428	31463
51570	48.989	10	Female	Marker_51570	Scaffold788	282264	282224
42826	49.183	10	Female	Marker_42826	Scaffold2246	65673	65630
173478	49.342	10	Female	Marker_173478	Scaffold198	396926	396887
201414	49.379	10	Female	Marker_201414	Scaffold247	449963	449923
208528	49.799	10	Female	Marker_208528	Scaffold4	976479	976521
47557	50.528	10	Female	Marker_47557	Scaffold282	444687	444648
70021	0	11	Female	Marker_70021	Scaffold54	20826	20786
169340	0.923	11	Female	Marker_169340	Scaffold1924	140007	139974
33150	0.973	11	Female	Marker_33150	Scaffold1157	139380	139417
22569	1.038	11	Female	Marker_22569	Scaffold568	312212	312172
114005	1.071	11	Female	Marker_114005	Scaffold2	301163	301123
111042	1.119	11	Female	Marker_111042	Scaffold2676	111532	111570
179599	1.128	11	Female	Marker_179599	Scaffold2	177738	177701
62662	1.509	11	Female	Marker_62662	Scaffold1	1131527	1131490
307868	1.523	11	Female	Marker_307868	Scaffold1	1052620	1052582
98511	1.525	11	Female	Marker_98511	Scaffold1	1499642	1499674
120486	1.532	11	Female	Marker_120486	Scaffold1	1186892	1186853
311351	1.535	11	Female	Marker_311351	Scaffold232	163213	163173
92788	1.547	11	Female	Marker_92788	Scaffold125	508296	508264
58189	1.551	11	Female	Marker_58189	Scaffold1	1497683	1497721
96396	1.558	11	Female	Marker_96396	Scaffold654	249434	249474
115984	1.561	11	Female	Marker_115984	Scaffold654	208989	208949
177585	1.562	11	Female	Marker_177585	Scaffold3941	17228	17265
85443	1.563	11	Female	Marker_85443	Scaffold654	249050	249087
261254	1.565	11	Female	Marker_261254	Scaffold232	22359	22321
297754	1.567	11	Female	Marker_297754	Scaffold1	1048590	1048553
76755	1.568	11	Female	Marker_76755	Scaffold232	283385	283424
136714	1.568	11	Female	Marker_136714	Scaffold315	621	651
254371	1.58	11	Female	Marker_254371	Scaffold125	352257	352217
134213	1.582	11	Female	Marker_134213	Scaffold125	333591	333551
246895	1.586	11	Female	Marker_246895	Scaffold654	233867	233825
233351	1.587	11	Female	Marker_233351	Scaffold654	216365	216344
254565	1.615	11	Female	Marker_254565	Scaffold232	66036	66070
122685	1.618	11	Female	Marker_122685	Scaffold1	1033883	1033845
121752	1.624	11	Female	Marker_121752	Scaffold647	189264	189304
210340	1.628	11	Female	Marker_210340	Scaffold125	523532	523494
60066	1.696	11	Female	Marker_60066	Scaffold1	1134622	1134662
101571	1.738	11	Female	Marker_101571	Scaffold232	84636	84599
226098	1.746	11	Female	Marker_226098	Scaffold249	721452	721412
330987	1.794	11	Female	Marker_330987	Scaffold249	759571	759609
258453	1.978	11	Female	Marker_258453	Scaffold568	385415	385443
176079	1.984	11	Female	Marker_176079	Scaffold568	86797	86834
97354	1.985	11	Female	Marker_97354	Scaffold624	540855	540819
97815	2.015	11	Female	Marker_97815	Scaffold624	571127	571167
101066	2.028	11	Female	Marker_101066	Scaffold2	500949	500979
320369	2.032	11	Female	Marker_320369	Scaffold2	383594	383553
172044	2.038	11	Female	Marker_172044	Scaffold568	224422	224382
183914	2.039	11	Female	Marker_183914	Scaffold453	238897	238931
152139	2.096	11	Female	Marker_152139	Scaffold624	739514	739554
22199	3.736	11	Female	Marker_22199	Scaffold1670	13449	13410
141908	19.23	11	Female	Marker_141908	Scaffold1549	176141	176166
47221	19.425	11	Female	Marker_47221	Scaffold916	16414	16378
125122	19.479	11	Female	Marker_125122	Scaffold916	165172	165212
24967	20.965	11	Female	Marker_24967	Scaffold916	200456	200493
76732	21.775	11	Female	Marker_76732	Scaffold1030	221343	221381
195087	21.808	11	Female	Marker_195087	Scaffold229	125067	125042
264624	21.821	11	Female	Marker_264624	Scaffold1030	306650	306686
47211	22.124	11	Female	Marker_47211	Scaffold2688	128	169
35311	24.051	11	Female	Marker_35311	Scaffold292	472691	472732
132336	24.367	11	Female	Marker_132336	Scaffold292	440240	440202
190795	26.01	11	Female	Marker_190795	Scaffold1140	77218	77257
189234	26.738	11	Female	Marker_189234	Scaffold2157	5655	5618
25695	26.792	11	Female	Marker_25695	Scaffold1770	37721	37759
301470	34.38	11	Female	Marker_301470	Scaffold182	721375	721415
252861	40.65	11	Female	Marker_252861	Scaffold315	550945	550984
102048	40.74	11	Female	Marker_102048	Scaffold315	570066	570030
79853	40.826	11	Female	Marker_79853	Scaffold315	542393	542433
267441	44.697	11	Female	Marker_267441	Scaffold147	354985	354959
150923	44.707	11	Female	Marker_150923	Scaffold2014	151437	151477
188050	44.815	11	Female	Marker_188050	Scaffold737	338690	338726
38176	46.147	11	Female	Marker_38176	Scaffold56	538657	538690
300681	46.228	11	Female	Marker_300681	Scaffold1250	242773	242805
221581	46.249	11	Female	Marker_221581	Scaffold114	111841	111882
215717	46.301	11	Female	Marker_215717	Scaffold1739	119811	119779
135338	46.303	11	Female	Marker_135338	Scaffold56	742482	742518
23421	46.328	11	Female	Marker_23421	Scaffold6552	1347	1382
46698	46.353	11	Female	Marker_46698	Scaffold1072	313262	313232
41372	46.354	11	Female	Marker_41372	Scaffold110	861368	861346
271882	46.405	11	Female	Marker_271882	Scaffold114	109320	109356
204482	46.536	11	Female	Marker_204482	Scaffold1833	259963	260001
294660	46.59	11	Female	Marker_294660	Scaffold490	53821	53858
116132	46.605	11	Female	Marker_116132	Scaffold1250	291990	291953
22302	47.08	11	Female	Marker_22302	Scaffold25947	111	135
237822	47.888	11	Female	Marker_237822	Scaffold114	748958	748995
113105	47.924	11	Female	Marker_113105	Scaffold1521	237816	237851
277165	48.076	11	Female	Marker_277165	Scaffold448	193031	193052
33221	48.081	11	Female	Marker_33221	Scaffold811	259785	259817
172482	48.143	11	Female	Marker_172482	Scaffold811	282341	282362
192502	48.173	11	Female	Marker_192502	Scaffold6643	559	529
154944	48.273	11	Female	Marker_154944	Scaffold811	181435	181398
159572	48.608	11	Female	Marker_159572	Scaffold114	1160448	1160486
257911	49.331	11	Female	Marker_257911	Scaffold1301	92552	92589
146402	49.872	11	Female	Marker_146402	Scaffold2097	35902	35859
158506	51.33	11	Female	Marker_158506	Scaffold303	471206	471165
297478	52.031	11	Female	Marker_297478	Scaffold1256	409669	409645
33101	52.082	11	Female	Marker_33101	Scaffold57	1098714	1098754
31307	52.723	11	Female	Marker_31307	Scaffold544	633951	633988
218150	52.769	11	Female	Marker_218150	Scaffold571	109761	109794
94234	52.855	11	Female	Marker_94234	Scaffold1279	60643	60681
101623	52.889	11	Female	Marker_101623	Scaffold2409	1124	1154
75638	53.421	11	Female	Marker_75638	Scaffold57	699243	699266
159578	53.459	11	Female	Marker_159578	Scaffold249	206220	206255
286277	53.501	11	Female	Marker_286277	Scaffold57	428819	428858
62598	53.518	11	Female	Marker_62598	Scaffold23609	1950	1920
332233	53.518	11	Female	Marker_332233	Scaffold249	142399	142359
90198	53.52	11	Female	Marker_90198	Scaffold193	337174	337139
264785	53.566	11	Female	Marker_264785	Scaffold824	173232	173260
15947	0.029	12	Female	Marker_15947	Scaffold233	553460	553500
103206	0.064	12	Female	Marker_103206	Scaffold3676	4140	4175
250359	0.172	12	Female	Marker_250359	Scaffold2207	58506	58482
297076	0.24	12	Female	Marker_297076	Scaffold1101	246112	246152
90004	0.364	12	Female	Marker_90004	Scaffold3597	491	454
180253	0.42	12	Female	Marker_180253	Scaffold500	398320	398289
128623	0.802	12	Female	Marker_128623	Scaffold2304	59717	59677
72304	0.808	12	Female	Marker_72304	Scaffold6158	4040	4080
176769	0.956	12	Female	Marker_176769	Scaffold858	516787	516823
144584	4.05	12	Female	Marker_144584	Scaffold2888	46596	46557
151064	6.763	12	Female	Marker_151064	Scaffold1742	17111	17145
54879	6.985	12	Female	Marker_54879	Scaffold8045	11373	11399
5052	7.438	12	Female	Marker_5052	Scaffold24341	782	747
10717	7.44	12	Female	Marker_10717	Scaffold3329	58781	58815
214657	7.626	12	Female	Marker_214657	Scaffold371	349072	349111
34684	7.746	12	Female	Marker_34684	Scaffold1513	83981	84017
113277	10.697	12	Female	Marker_113277	Scaffold3787	60592	60630
299068	11.034	12	Female	Marker_299068	Scaffold7310	328	299
201857	11.083	12	Female	Marker_201857	Scaffold1799	82723	82753
175341	11.104	12	Female	Marker_175341	Scaffold729	184648	184688
113100	11.119	12	Female	Marker_113100	Scaffold7355	2215	2175
125633	11.121	12	Female	Marker_125633	Scaffold520	374450	374483
34929	11.17	12	Female	Marker_34929	Scaffold224	401897	401933
112572	11.232	12	Female	Marker_112572	Scaffold2408	67957	67917
184697	11.279	12	Female	Marker_184697	Scaffold518	165337	165295
187466	11.374	12	Female	Marker_187466	Scaffold6633	378	350
293650	11.42	12	Female	Marker_293650	Scaffold3256	21608	21644
187394	11.547	12	Female	Marker_187394	Scaffold224	377855	377818
29717	11.56	12	Female	Marker_29717	Scaffold2121	86734	86767
116415	11.561	12	Female	Marker_116415	Scaffold859	82690	82722
158178	12.839	12	Female	Marker_158178	Scaffold411	616126	616099
220820	12.841	12	Female	Marker_220820	Scaffold264	257801	257840
89770	27.662	12	Female	Marker_89770	Scaffold582	19208	19177
283394	27.672	12	Female	Marker_283394	Scaffold1361	126885	126918
335967	27.692	12	Female	Marker_335967	Scaffold2459	58758	58798
173785	27.717	12	Female	Marker_173785	Scaffold582	33373	33413
164750	27.872	12	Female	Marker_164750	Scaffold1753	98178	98215
93054	33.377	12	Female	Marker_93054	Scaffold676	292585	292625
204208	33.393	12	Female	Marker_204208	Scaffold19096	271	234
203782	33.557	12	Female	Marker_203782	Scaffold1559	74034	74056
171072	33.627	12	Female	Marker_171072	Scaffold525	117305	117265
224747	33.652	12	Female	Marker_224747	Scaffold676	309681	309721
104727	33.667	12	Female	Marker_104727	Scaffold1168	128108	128137
82362	33.675	12	Female	Marker_82362	Scaffold8460	6437	6473
26898	33.68	12	Female	Marker_26898	Scaffold925	82918	82940
260803	33.689	12	Female	Marker_260803	Scaffold223	586372	586335
283275	33.705	12	Female	Marker_283275	Scaffold471	133126	133097
45137	33.712	12	Female	Marker_45137	Scaffold223	586495	586455
113778	33.718	12	Female	Marker_113778	Scaffold1400	222004	221968
234175	33.747	12	Female	Marker_234175	Scaffold752	8119	8158
148318	33.874	12	Female	Marker_148318	Scaffold1654	110056	110089
318377	34.818	12	Female	Marker_318377	Scaffold5285	1587	1553
304669	34.827	12	Female	Marker_304669	Scaffold9	493976	494008
183403	34.831	12	Female	Marker_183403	Scaffold2715	41230	41198
59168	34.906	12	Female	Marker_59168	Scaffold2074	7190	7150
44454	34.926	12	Female	Marker_44454	Scaffold2001	147006	146974
181919	35.091	12	Female	Marker_181919	Scaffold3127	24983	24950
132788	35.324	12	Female	Marker_132788	Scaffold9	530841	530869
204110	37.816	12	Female	Marker_204110	Scaffold781	110487	110523
30688	38.17	12	Female	Marker_30688	Scaffold781	317644	317681
12825	38.521	12	Female	Marker_12825	Scaffold189	60185	60152
155033	39.47	12	Female	Marker_155033	Scaffold575	252843	252883
67206	41.374	12	Female	Marker_67206	Scaffold793	174208	174245
331268	0.017	13	Female	Marker_331268	Scaffold3636	56849	56889
214746	0.134	13	Female	Marker_214746	Scaffold3480	8093	8054
133470	0.295	13	Female	Marker_133470	Scaffold111	275024	275062
29273	1.526	13	Female	Marker_29273	Scaffold24	683583	683622
309611	1.544	13	Female	Marker_309611	Scaffold2019	59806	59837
179723	1.654	13	Female	Marker_179723	Scaffold24	534248	534288
271126	1.714	13	Female	Marker_271126	Scaffold2140	44411	44444
225846	1.732	13	Female	Marker_225846	Scaffold135	175731	175702
93368	3.079	13	Female	Marker_93368	Scaffold1150	349067	349040
60850	3.085	13	Female	Marker_60850	Scaffold447	72981	73021
184476	4.54	13	Female	Marker_184476	Scaffold7944	208	171
326157	4.541	13	Female	Marker_326157	Scaffold1067	18866	18892
134427	4.545	13	Female	Marker_134427	Scaffold551	169060	169019
127373	4.552	13	Female	Marker_127373	Scaffold52	635559	635588
147505	4.62	13	Female	Marker_147505	Scaffold551	215615	215655
34713	4.623	13	Female	Marker_34713	Scaffold2482	78665	78628
236242	4.838	13	Female	Marker_236242	Scaffold8255	2872	2911
78782	4.844	13	Female	Marker_78782	Scaffold982	65751	65783
287901	13.897	13	Female	Marker_287901	Scaffold834	56763	56729
37766	13.955	13	Female	Marker_37766	Scaffold2161	27604	27641
241578	14.284	13	Female	Marker_241578	Scaffold483	18805	18766
285690	14.73	13	Female	Marker_285690	Scaffold2452	23164	23202
244175	14.979	13	Female	Marker_244175	Scaffold2452	47592	47632
18414	15.299	13	Female	Marker_18414	Scaffold2452	13714	13751
275563	18.352	13	Female	Marker_275563	Scaffold881	280823	280786
295409	27.736	13	Female	Marker_295409	Scaffold167	696111	696071
78290	30.42	13	Female	Marker_78290	Scaffold551	306326	306360
44711	30.516	13	Female	Marker_44711	Scaffold1001	93596	93558
294895	35.051	13	Female	Marker_294895	Scaffold1844	32610	32570
19479	36.172	13	Female	Marker_19479	Scaffold249	499121	499085
311602	39.555	13	Female	Marker_311602	Scaffold1992	160415	160382
263040	40.146	13	Female	Marker_263040	Scaffold778	55398	55363
129165	41.678	13	Female	Marker_129165	Scaffold28534	11278	11238
159846	41.935	13	Female	Marker_159846	Scaffold616	140214	140174
10046	42.114	13	Female	Marker_10046	Scaffold15143	3946	3916
166329	42.154	13	Female	Marker_166329	Scaffold382	235279	235243
160234	42.16	13	Female	Marker_160234	Scaffold552	18447	18414
317841	42.184	13	Female	Marker_317841	Scaffold616	450520	450560
273366	42.202	13	Female	Marker_273366	Scaffold1501	75760	75800
49990	42.214	13	Female	Marker_49990	Scaffold307	343505	343545
279147	42.953	13	Female	Marker_279147	Scaffold922	166861	166901
305896	43.305	13	Female	Marker_305896	Scaffold922	205220	205254
308286	43.385	13	Female	Marker_308286	Scaffold1202	157331	157291
89948	43.417	13	Female	Marker_89948	Scaffold109	176504	176477
201244	6.626	14	Female	Marker_201244	Scaffold161	597411	597450
61054	6.649	14	Female	Marker_61054	Scaffold1708	79704	79664
248877	6.713	14	Female	Marker_248877	Scaffold20	399973	399997
128015	7.269	14	Female	Marker_128015	Scaffold45	1059510	1059544
71507	7.306	14	Female	Marker_71507	Scaffold345	461015	460975
209738	7.411	14	Female	Marker_209738	Scaffold345	677271	677237
163673	7.624	14	Female	Marker_163673	Scaffold344	711481	711441
270550	7.682	14	Female	Marker_270550	Scaffold3132	70740	70700
223419	7.702	14	Female	Marker_223419	Scaffold511	614971	615011
221732	7.729	14	Female	Marker_221732	Scaffold202	557231	557271
6586	7.844	14	Female	Marker_6586	Scaffold241	562064	562107
134939	8.003	14	Female	Marker_134939	Scaffold1957	46789	46749
185013	8.01	14	Female	Marker_185013	Scaffold1951	67872	67848
264015	8.018	14	Female	Marker_264015	Scaffold1181	203311	203282
152070	8.028	14	Female	Marker_152070	Scaffold724	58110	58080
160287	8.04	14	Female	Marker_160287	Scaffold2008	43130	43090
54725	8.054	14	Female	Marker_54725	Scaffold259	250524	250560
35975	8.063	14	Female	Marker_35975	Scaffold344	219646	219683
177861	8.072	14	Female	Marker_177861	Scaffold3747	1423	1457
197211	8.076	14	Female	Marker_197211	Scaffold344	564818	564776
131137	8.16	14	Female	Marker_131137	Scaffold344	847096	847133
300362	8.166	14	Female	Marker_300362	Scaffold344	404287	404253
167829	8.479	14	Female	Marker_167829	Scaffold3132	58673	58702
144192	8.495	14	Female	Marker_144192	Scaffold345	322727	322691
129862	8.51	14	Female	Marker_129862	Scaffold202	571912	571949
66140	8.835	14	Female	Marker_66140	Scaffold1207	390703	390674
132921	8.838	14	Female	Marker_132921	Scaffold1496	299340	299306
95454	9.017	14	Female	Marker_95454	Scaffold161	503231	503263
37460	9.026	14	Female	Marker_37460	Scaffold1253	94890	94856
90534	9.069	14	Female	Marker_90534	Scaffold161	691566	691534
259663	9.099	14	Female	Marker_259663	Scaffold1207	361553	361593
97855	10.743	14	Female	Marker_97855	Scaffold45	957591	957632
257302	11.408	14	Female	Marker_257302	Scaffold25	888380	888344
135511	11.45	14	Female	Marker_135511	Scaffold45	882959	882999
166107	15.6	14	Female	Marker_166107	Scaffold728	316946	316921
138230	15.844	14	Female	Marker_138230	Scaffold1297	197365	197400
252943	16.558	14	Female	Marker_252943	Scaffold225	962254	962291
58061	38.043	14	Female	Marker_58061	Scaffold408	504152	504188
151269	38.702	14	Female	Marker_151269	Scaffold2772	54624	54585
23944	50.541	14	Female	Marker_23944	Scaffold1754	58952	58981
315542	61.43	14	Female	Marker_315542	Scaffold95	481713	481752
180653	64.122	14	Female	Marker_180653	Scaffold256	564114	564077
27778	64.179	14	Female	Marker_27778	Scaffold83	116988	117028
95404	64.183	14	Female	Marker_95404	Scaffold2907	32513	32552
86298	64.205	14	Female	Marker_86298	Scaffold1686	166313	166277
49583	64.22	14	Female	Marker_49583	Scaffold1686	166310	166350
55705	64.223	14	Female	Marker_55705	Scaffold2171	24323	24353
173261	64.284	14	Female	Marker_173261	Scaffold1257	164282	164244
153133	64.306	14	Female	Marker_153133	Scaffold256	417103	417132
35868	64.344	14	Female	Marker_35868	Scaffold1512	136427	136470
59502	64.355	14	Female	Marker_59502	Scaffold4290	2496	2532
207452	64.362	14	Female	Marker_207452	Scaffold256	7727	7689
158896	64.37	14	Female	Marker_158896	Scaffold256	275536	275498
209910	64.462	14	Female	Marker_209910	Scaffold256	333872	333832
62214	65.127	14	Female	Marker_62214	Scaffold2012	42469	42431
138501	65.137	14	Female	Marker_138501	Scaffold1110	170769	170729
18947	66.432	14	Female	Marker_18947	Scaffold356	191466	191426
76308	70.69	14	Female	Marker_76308	Scaffold40	128181	128219
142126	0	15	Female	Marker_142126	Scaffold336	383679	383639
68362	0.142	15	Female	Marker_68362	Scaffold336	48464	48493
246931	1.044	15	Female	Marker_246931	Scaffold336	320060	320022
182099	6.901	15	Female	Marker_182099	Scaffold3944	8868	8828
163379	6.922	15	Female	Marker_163379	Scaffold710	37377	37350
171012	6.978	15	Female	Marker_171012	Scaffold6346	2503	2543
74373	6.989	15	Female	Marker_74373	Scaffold1707	100792	100755
221380	7.011	15	Female	Marker_221380	Scaffold317	666297	666266
321227	7.027	15	Female	Marker_321227	Scaffold2149	173344	173311
127821	7.03	15	Female	Marker_127821	Scaffold486	81351	81327
87036	7.042	15	Female	Marker_87036	Scaffold906	273703	273669
40468	7.046	15	Female	Marker_40468	Scaffold317	471638	471677
36135	7.081	15	Female	Marker_36135	Scaffold6204	21020	21055
241033	7.258	15	Female	Marker_241033	Scaffold710	152924	152961
204887	7.296	15	Female	Marker_204887	Scaffold486	214415	214455
259489	7.514	15	Female	Marker_259489	Scaffold486	248531	248491
161453	7.583	15	Female	Marker_161453	Scaffold934	16141	16173
28066	8.82	15	Female	Marker_28066	Scaffold3623	6429	6389
236596	10.186	15	Female	Marker_236596	Scaffold997	312258	312298
73086	13.981	15	Female	Marker_73086	Scaffold2709	51708	51687
103325	14.061	15	Female	Marker_103325	Scaffold5719	1720	1692
18216	14.835	15	Female	Marker_18216	Scaffold32	687791	687754
196663	14.848	15	Female	Marker_196663	Scaffold2166	55739	55779
199637	14.921	15	Female	Marker_199637	Scaffold32	834600	834564
104921	15.262	15	Female	Marker_104921	Scaffold1249	19224	19264
18076	15.452	15	Female	Marker_18076	Scaffold4174	5844	5806
164646	15.968	15	Female	Marker_164646	Scaffold1332	53148	53109
10811	16.009	15	Female	Marker_10811	Scaffold2232	13985	13945
174218	16.199	15	Female	Marker_174218	Scaffold229	656493	656524
232423	16.268	15	Female	Marker_232423	Scaffold2232	13982	14022
166682	16.58	15	Female	Marker_166682	Scaffold1177	129287	129309
119880	30.769	15	Female	Marker_119880	Scaffold3365	18398	18436
115244	36.345	15	Female	Marker_115244	Scaffold713	52675	52648
310503	38.195	15	Female	Marker_310503	Scaffold5358	3610	3570
239261	40.095	15	Female	Marker_239261	Scaffold222	448801	448840
177579	40.158	15	Female	Marker_177579	Scaffold1278	141154	141188
127479	40.324	15	Female	Marker_127479	Scaffold1021	148686	148652
55731	40.357	15	Female	Marker_55731	Scaffold871	46458	46498
145823	40.39	15	Female	Marker_145823	Scaffold643	234983	234950
271518	40.493	15	Female	Marker_271518	Scaffold1912	71366	71326
162755	40.712	15	Female	Marker_162755	Scaffold222	533029	533069
183681	41.114	15	Female	Marker_183681	Scaffold1929	47237	47210
182161	41.809	15	Female	Marker_182161	Scaffold935	149649	149617
156810	41.953	15	Female	Marker_156810	Scaffold966	230681	230720
196860	41.986	15	Female	Marker_196860	Scaffold58	766473	766501
141423	42.096	15	Female	Marker_141423	Scaffold5561	28869	28830
225989	42.374	15	Female	Marker_225989	Scaffold2701	14835	14874
336969	46.592	15	Female	Marker_336969	Scaffold2498	49245	49211
203006	47.44	15	Female	Marker_203006	Scaffold1782	116923	116963
325640	54.518	15	Female	Marker_325640	Scaffold2461	32026	32067
133965	54.553	15	Female	Marker_133965	Scaffold1459	24632	24659
208629	55.704	15	Female	Marker_208629	Scaffold269	409132	409172
322531	55.811	15	Female	Marker_322531	Scaffold22823	1418	1450
344446	0	16	Female	Marker_344446	Scaffold240	542948	542909
120036	0.035	16	Female	Marker_120036	Scaffold212	345778	345814
190359	0.041	16	Female	Marker_190359	Scaffold1351	79666	79693
76938	0.045	16	Female	Marker_76938	Scaffold748	3845	3814
279784	0.051	16	Female	Marker_279784	Scaffold353	50305	50264
64551	0.059	16	Female	Marker_64551	Scaffold1954	112572	112537
166347	0.075	16	Female	Marker_166347	Scaffold1135	23937	23968
126910	0.075	16	Female	Marker_126910	Scaffold92	468477	468442
98823	0.08	16	Female	Marker_98823	Scaffold1081	184813	184776
210096	0.081	16	Female	Marker_210096	Scaffold5264	46486	46446
179993	0.086	16	Female	Marker_179993	Scaffold6261	9828	9853
256549	0.121	16	Female	Marker_256549	Scaffold1535	21762	21723
196800	0.134	16	Female	Marker_196800	Scaffold874	197999	198037
198267	0.135	16	Female	Marker_198267	Scaffold206	149567	149527
191571	0.159	16	Female	Marker_191571	Scaffold1582	13778	13741
291461	0.175	16	Female	Marker_291461	Scaffold27512	297	331
227603	0.276	16	Female	Marker_227603	Scaffold212	333959	333932
88782	0.298	16	Female	Marker_88782	Scaffold362	723262	723223
257164	20.178	16	Female	Marker_257164	Scaffold1026	20166	20126
47698	20.354	16	Female	Marker_47698	Scaffold2032	60690	60727
48092	20.607	16	Female	Marker_48092	Scaffold747	300049	300009
321972	20.797	16	Female	Marker_321972	Scaffold1026	20163	20203
135866	20.877	16	Female	Marker_135866	Scaffold585	41422	41383
99976	21.108	16	Female	Marker_99976	Scaffold2032	104366	104345
314824	21.227	16	Female	Marker_314824	Scaffold2	1087160	1087139
95256	21.295	16	Female	Marker_95256	Scaffold1026	87187	87227
209124	21.355	16	Female	Marker_209124	Scaffold3460	31164	31207
153242	22.522	16	Female	Marker_153242	Scaffold3598	53345	53305
109482	22.619	16	Female	Marker_109482	Scaffold379	481079	481113
251478	23.267	16	Female	Marker_251478	Scaffold379	307944	307917
71363	24.589	16	Female	Marker_71363	Scaffold134	865838	865878
215755	26.505	16	Female	Marker_215755	Scaffold806	463972	463932
107062	26.943	16	Female	Marker_107062	Scaffold1612	31146	31108
180053	26.982	16	Female	Marker_180053	Scaffold134	686291	686329
112347	27.632	16	Female	Marker_112347	Scaffold134	517146	517106
117933	29.006	16	Female	Marker_117933	Scaffold134	517149	517176
105910	31.706	16	Female	Marker_105910	Scaffold134	480846	480883
44562	32.009	16	Female	Marker_44562	Scaffold1276	196485	196459
162105	32.104	16	Female	Marker_162105	Scaffold134	61203	61169
254431	38.245	16	Female	Marker_254431	Scaffold121	148885	148924
245494	44.031	16	Female	Marker_245494	Scaffold1403	88835	88875
213526	44.356	16	Female	Marker_213526	Scaffold682	155207	155245
282612	44.434	16	Female	Marker_282612	Scaffold621	449403	449363
30673	44.617	16	Female	Marker_30673	Scaffold2648	63365	63389
276487	44.845	16	Female	Marker_276487	Scaffold621	397671	397633
244063	45.985	16	Female	Marker_244063	Scaffold569	175917	175948
116294	46.1	16	Female	Marker_116294	Scaffold64	50420	50458
101563	46.133	16	Female	Marker_101563	Scaffold1901	118217	118257
194688	46.189	16	Female	Marker_194688	Scaffold67	362822	362782
9324	46.28	16	Female	Marker_9324	Scaffold7708	1976	2016
252011	46.287	16	Female	Marker_252011	Scaffold67	160821	160861
212219	49.091	16	Female	Marker_212219	Scaffold23570	644	619
197744	50.305	16	Female	Marker_197744	Scaffold1403	88838	88798
195613	0	17	Female	Marker_195613	Scaffold853	252433	252409
305484	0.637	17	Female	Marker_305484	Scaffold445	247076	247115
248865	0.703	17	Female	Marker_248865	Scaffold1594	73426	73388
74898	2.099	17	Female	Marker_74898	Scaffold31528	2069	2039
172131	2.177	17	Female	Marker_172131	Scaffold4691	13174	13137
95237	2.181	17	Female	Marker_95237	Scaffold5249	294	254
271730	2.431	17	Female	Marker_271730	Scaffold298	335246	335209
293814	3.048	17	Female	Marker_293814	Scaffold53	913908	913944
305066	3.103	17	Female	Marker_305066	Scaffold77	438075	438045
17313	3.107	17	Female	Marker_17313	Scaffold4901	5277	5237
214915	3.119	17	Female	Marker_214915	Scaffold11186	539	518
18038	3.138	17	Female	Marker_18038	Scaffold87	785230	785271
241106	3.159	17	Female	Marker_241106	Scaffold143	131587	131617
331	3.209	17	Female	Marker_331	Scaffold143	178386	178416
152326	3.209	17	Female	Marker_152326	Scaffold1903	48481	48515
91925	3.212	17	Female	Marker_91925	Scaffold2662	70071	70043
36601	3.253	17	Female	Marker_36601	Scaffold77	24662	24701
240918	3.291	17	Female	Marker_240918	Scaffold2444	4248	4208
173127	3.332	17	Female	Marker_173127	Scaffold2444	89239	89280
200438	3.541	17	Female	Marker_200438	Scaffold1787	144612	144574
7197	4.217	17	Female	Marker_7197	Scaffold743	15103	15139
210849	6.346	17	Female	Marker_210849	Scaffold989	25582	25542
18759	7.924	17	Female	Marker_18759	Scaffold14	1120804	1120839
196339	8.779	17	Female	Marker_196339	Scaffold14	867135	867106
73905	11.645	17	Female	Marker_73905	Scaffold89	436369	436406
68561	11.704	17	Female	Marker_68561	Scaffold89	529608	529643
72115	32.598	17	Female	Marker_72115	Scaffold5178	8482	8521
337478	32.696	17	Female	Marker_337478	Scaffold2362	28777	28737
171671	32.773	17	Female	Marker_171671	Scaffold24185	6697	6661
75938	32.777	17	Female	Marker_75938	Scaffold3320	8923	8962
195453	33.756	17	Female	Marker_195453	Scaffold100	981415	981378
269891	34.206	17	Female	Marker_269891	Scaffold1934	33917	33957
114573	34.235	17	Female	Marker_114573	Scaffold478	441657	441622
199046	34.247	17	Female	Marker_199046	Scaffold1179	105726	105764
143592	34.256	17	Female	Marker_143592	Scaffold1269	85167	85130
221694	34.268	17	Female	Marker_221694	Scaffold1238	233640	233674
242520	34.27	17	Female	Marker_242520	Scaffold1743	119092	119054
114404	34.276	17	Female	Marker_114404	Scaffold5074	95	137
42031	34.279	17	Female	Marker_42031	Scaffold1113	234549	234517
225601	34.311	17	Female	Marker_225601	Scaffold634	165194	165161
281305	34.317	17	Female	Marker_281305	Scaffold4808	12743	12702
45050	34.326	17	Female	Marker_45050	Scaffold322	417763	417801
42742	34.326	17	Female	Marker_42742	Scaffold478	605486	605446
171216	34.335	17	Female	Marker_171216	Scaffold1269	171548	171587
217386	34.344	17	Female	Marker_217386	Scaffold322	348534	348494
263061	34.344	17	Female	Marker_263061	Scaffold478	24330	24295
207145	34.351	17	Female	Marker_207145	Scaffold330	440884	440924
217776	34.361	17	Female	Marker_217776	Scaffold1238	299087	299047
172342	34.4	17	Female	Marker_172342	Scaffold7391	5301	5341
240384	34.401	17	Female	Marker_240384	Scaffold1020	100557	100597
64426	34.402	17	Female	Marker_64426	Scaffold2447	85661	85697
155515	34.415	17	Female	Marker_155515	Scaffold322	383580	383538
255674	34.417	17	Female	Marker_255674	Scaffold246	479148	479110
280628	34.441	17	Female	Marker_280628	Scaffold29095	5116	5147
305304	34.443	17	Female	Marker_305304	Scaffold1238	261559	261522
293717	34.459	17	Female	Marker_293717	Scaffold1398	15270	15311
234820	34.482	17	Female	Marker_234820	Scaffold538	399733	399762
124209	34.491	17	Female	Marker_124209	Scaffold246	506219	506259
293246	34.502	17	Female	Marker_293246	Scaffold246	563308	563273
314662	34.508	17	Female	Marker_314662	Scaffold990	233861	233895
149047	35.493	17	Female	Marker_149047	Scaffold537	385342	385383
24001	35.584	17	Female	Marker_24001	Scaffold2668	66454	66497
104553	36.274	17	Female	Marker_104553	Scaffold836	167264	167299
279013	36.559	17	Female	Marker_279013	Scaffold2362	37968	37931
197168	39.042	17	Female	Marker_197168	Scaffold2299	70569	70536
117806	39.356	17	Female	Marker_117806	Scaffold1426	71365	71327
194972	39.993	17	Female	Marker_194972	Scaffold205	387089	387128
98308	40.774	17	Female	Marker_98308	Scaffold5167	1690	1712
87114	40.842	17	Female	Marker_87114	Scaffold10	441820	441781
295535	40.842	17	Female	Marker_295535	Scaffold10	435321	435285
245585	42.531	17	Female	Marker_245585	Scaffold1605	7415	7375
55346	43.322	17	Female	Marker_55346	Scaffold8580	10982	11020
30291	2.07	18	Female	Marker_30291	Scaffold239	178535	178503
137320	4.487	18	Female	Marker_137320	Scaffold239	178543	178580
274165	8.092	18	Female	Marker_274165	Scaffold1009	24016	24054
233932	8.143	18	Female	Marker_233932	Scaffold443	141405	141370
151114	8.941	18	Female	Marker_151114	Scaffold1472	40362	40323
12320	9.014	18	Female	Marker_12320	Scaffold443	415138	415100
231487	9.143	18	Female	Marker_231487	Scaffold1858	85420	85460
278802	9.284	18	Female	Marker_278802	Scaffold124	686430	686467
309948	9.286	18	Female	Marker_309948	Scaffold3599	19177	19211
31871	9.29	18	Female	Marker_31871	Scaffold470	77622	77652
121040	10.61	18	Female	Marker_121040	Scaffold1463	118095	118063
166080	10.613	18	Female	Marker_166080	Scaffold1224	99637	99677
228389	11.299	18	Female	Marker_228389	Scaffold3835	10229	10205
287342	11.573	18	Female	Marker_287342	Scaffold22054	579	539
20249	11.976	18	Female	Marker_20249	Scaffold535	284352	284392
187419	11.989	18	Female	Marker_187419	Scaffold274	211404	211443
311868	12.003	18	Female	Marker_311868	Scaffold13	1215144	1215107
291837	12.004	18	Female	Marker_291837	Scaffold284	370357	370320
15901	12.009	18	Female	Marker_15901	Scaffold522	470588	470552
20252	12.011	18	Female	Marker_20252	Scaffold8331	1774	1735
20518	14.765	18	Female	Marker_20518	Scaffold3666	20225	20248
295810	14.807	18	Female	Marker_295810	Scaffold1591	107009	106973
10702	15.011	18	Female	Marker_10702	Scaffold2794	24831	24871
242612	15.06	18	Female	Marker_242612	Scaffold2605	40644	40682
216454	15.062	18	Female	Marker_216454	Scaffold2855	36187	36147
81293	15.063	18	Female	Marker_81293	Scaffold3139	46622	46660
236584	15.091	18	Female	Marker_236584	Scaffold499	173568	173528
49349	16.305	18	Female	Marker_49349	Scaffold358	41221	41259
213723	16.568	18	Female	Marker_213723	Scaffold3838	4448	4487
143631	16.569	18	Female	Marker_143631	Scaffold522	412907	412867
159935	16.607	18	Female	Marker_159935	Scaffold522	400654	400690
98583	16.607	18	Female	Marker_98583	Scaffold813	265620	265660
222738	16.613	18	Female	Marker_222738	Scaffold269	554514	554546
14253	16.658	18	Female	Marker_14253	Scaffold522	215224	215261
7300	0	19	Female	Marker_7300	Scaffold1349	13538	13498
98046	2.977	19	Female	Marker_98046	Scaffold663	176228	176188
315570	3.006	19	Female	Marker_315570	Scaffold1642	150431	150392
245167	3.046	19	Female	Marker_245167	Scaffold533	179858	179898
28997	3.098	19	Female	Marker_28997	Scaffold2839	22383	22359
60123	3.173	19	Female	Marker_60123	Scaffold1642	250858	250820
135908	4.101	19	Female	Marker_135908	Scaffold1919	25810	25776
197023	6.891	19	Female	Marker_197023	Scaffold122	1012009	1012046
125531	7.084	19	Female	Marker_125531	Scaffold2659	153892	153927
315719	7.45	19	Female	Marker_315719	Scaffold50	784541	784505
298657	7.54	19	Female	Marker_298657	Scaffold50	445513	445553
228074	7.553	19	Female	Marker_228074	Scaffold50	1321041	1321005
156347	7.555	19	Female	Marker_156347	Scaffold50	535773	535800
101184	7.561	19	Female	Marker_101184	Scaffold50	1200092	1200058
218551	18.917	19	Female	Marker_218551	Scaffold175	549729	549759
110422	31.48	19	Female	Marker_110422	Scaffold16	363739	363705
213716	31.573	19	Female	Marker_213716	Scaffold1441	241468	241506
175805	31.607	19	Female	Marker_175805	Scaffold629	476038	476078
67794	31.648	19	Female	Marker_67794	Scaffold2777	61115	61155
254807	35.288	19	Female	Marker_254807	Scaffold4169	19230	19268
112447	35.492	19	Female	Marker_112447	Scaffold482	119389	119429
233987	36.106	19	Female	Marker_233987	Scaffold1574	138813	138854
267512	36.154	19	Female	Marker_267512	Scaffold482	119392	119352
215552	36.17	19	Female	Marker_215552	Scaffold183	510475	510514
263808	36.218	19	Female	Marker_263808	Scaffold1640	51859	51822
246803	36.256	19	Female	Marker_246803	Scaffold4323	8338	8375
202136	36.293	19	Female	Marker_202136	Scaffold1640	215421	215461
146529	36.458	19	Female	Marker_146529	Scaffold6793	15437	15397
118668	36.546	19	Female	Marker_118668	Scaffold6793	4671	4711
238257	36.641	19	Female	Marker_238257	Scaffold1574	122871	122903
69222	53.179	19	Female	Marker_69222	Scaffold175	110047	110087
43430	53.257	19	Female	Marker_43430	Scaffold1191	308742	308716
27608	54.83	19	Female	Marker_27608	Scaffold175	347498	347460
154881	54.874	19	Female	Marker_154881	Scaffold1191	402623	402664
184881	55.724	19	Female	Marker_184881	Scaffold565	709812	709781
142667	55.777	19	Female	Marker_142667	Scaffold2530	24652	24620
278007	55.919	19	Female	Marker_278007	Scaffold122	331399	331359
59256	55.96	19	Female	Marker_59256	Scaffold146	445211	445178
47216	55.973	19	Female	Marker_47216	Scaffold122	302631	302602
125211	56.09	19	Female	Marker_125211	Scaffold122	338936	338902
131388	56.469	19	Female	Marker_131388	Scaffold127	137788	137751
322379	56.915	19	Female	Marker_322379	Scaffold122	268439	268399
218591	57.06	19	Female	Marker_218591	Scaffold14376	626	594
322850	58.427	19	Female	Marker_322850	Scaffold1395	11130	11172
152526	58.443	19	Female	Marker_152526	Scaffold243	441627	441597
306030	58.457	19	Female	Marker_306030	Scaffold697	455590	455549
169318	58.458	19	Female	Marker_169318	Scaffold2637	164293	164329
155932	58.491	19	Female	Marker_155932	Scaffold2637	83487	83447
57843	58.619	19	Female	Marker_57843	Scaffold243	640325	640290
164719	58.63	19	Female	Marker_164719	Scaffold3865	20378	20339
77120	58.655	19	Female	Marker_77120	Scaffold1566	71974	71934
38326	58.658	19	Female	Marker_38326	Scaffold91	159115	159074
213296	58.659	19	Female	Marker_213296	Scaffold801	106020	106062
182594	58.714	19	Female	Marker_182594	Scaffold1029	33813	33785
235676	58.721	19	Female	Marker_235676	Scaffold91	24558	24521
337975	59.51	19	Female	Marker_337975	Scaffold257	447114	447151
268847	59.701	19	Female	Marker_268847	Scaffold807	197110	197072
296725	59.744	19	Female	Marker_296725	Scaffold640	322524	322561
212635	59.969	19	Female	Marker_212635	Scaffold640	66870	66826
242740	59.978	19	Female	Marker_242740	Scaffold640	340393	340353
206244	59.996	19	Female	Marker_206244	Scaffold640	428320	428281
219797	59.998	19	Female	Marker_219797	Scaffold1029	255905	255944
129674	61.066	19	Female	Marker_129674	Scaffold90	938890	938930
141407	61.164	19	Female	Marker_141407	Scaffold38	263517	263557
197927	61.194	19	Female	Marker_197927	Scaffold8718	10979	10942
211513	61.435	19	Female	Marker_211513	Scaffold38	327677	327638
272659	61.798	19	Female	Marker_272659	Scaffold3750	28058	28027
201262	61.823	19	Female	Marker_201262	Scaffold1311	239946	239983
178254	61.887	19	Female	Marker_178254	Scaffold38	410548	410505
231820	61.904	19	Female	Marker_231820	Scaffold38	449457	449495
104379	0	2	Female	Marker_104379	Scaffold1396	221882	221842
241282	2.551	2	Female	Marker_241282	Scaffold115	256096	256058
21015	12.075	2	Female	Marker_21015	Scaffold812	118011	118051
219314	14.387	2	Female	Marker_219314	Scaffold188	687806	687845
52323	14.395	2	Female	Marker_52323	Scaffold188	715048	715024
134773	14.453	2	Female	Marker_134773	Scaffold579	466998	466977
188925	14.588	2	Female	Marker_188925	Scaffold188	687805	687761
123236	14.891	2	Female	Marker_123236	Scaffold8951	5499	5529
3878	14.892	2	Female	Marker_3878	Scaffold178	144579	144605
245928	14.941	2	Female	Marker_245928	Scaffold641	381920	381958
243944	14.945	2	Female	Marker_243944	Scaffold1511	27442	27400
19660	14.957	2	Female	Marker_19660	Scaffold600	43842	43867
275433	14.995	2	Female	Marker_275433	Scaffold641	393492	393525
30707	15.038	2	Female	Marker_30707	Scaffold178	221618	221578
199997	15.077	2	Female	Marker_199997	Scaffold63	425200	425171
191771	15.162	2	Female	Marker_191771	Scaffold311	390266	390305
160768	15.162	2	Female	Marker_160768	Scaffold680	108690	108653
137802	15.19	2	Female	Marker_137802	Scaffold63	161538	161498
115384	15.215	2	Female	Marker_115384	Scaffold1068	14578	14618
297880	15.487	2	Female	Marker_297880	Scaffold188	180144	180104
210603	15.759	2	Female	Marker_210603	Scaffold211	379042	379064
228111	15.761	2	Female	Marker_228111	Scaffold188	613134	613172
123453	15.772	2	Female	Marker_123453	Scaffold149	237826	237787
47574	15.85	2	Female	Marker_47574	Scaffold1070	108034	108007
219929	15.916	2	Female	Marker_219929	Scaffold1564	119672	119641
45467	16.053	2	Female	Marker_45467	Scaffold2845	13505	13465
44644	16.166	2	Female	Marker_44644	Scaffold759	302294	302271
53807	16.183	2	Female	Marker_53807	Scaffold877	125773	125733
140490	16.243	2	Female	Marker_140490	Scaffold17654	13551	13591
34316	16.359	2	Female	Marker_34316	Scaffold1564	266194	266154
91610	16.373	2	Female	Marker_91610	Scaffold194	860073	860038
86952	16.506	2	Female	Marker_86952	Scaffold2713	43492	43531
69517	17.133	2	Female	Marker_69517	Scaffold911	292720	292683
93147	17.245	2	Female	Marker_93147	Scaffold911	266351	266324
28999	17.767	2	Female	Marker_28999	Scaffold3	438565	438525
328237	17.827	2	Female	Marker_328237	Scaffold1409	20612	20575
330356	17.831	2	Female	Marker_330356	Scaffold17199	2405	2365
255111	17.864	2	Female	Marker_255111	Scaffold5772	4609	4648
150497	18.604	2	Female	Marker_150497	Scaffold812	78683	78642
195467	21.955	2	Female	Marker_195467	Scaffold1879	8025	7986
169075	22.391	2	Female	Marker_169075	Scaffold1723	89010	89050
235484	23.268	2	Female	Marker_235484	Scaffold2064	186829	186860
41079	24.768	2	Female	Marker_41079	Scaffold59	414510	414545
84556	25.782	2	Female	Marker_84556	Scaffold651	626052	626092
34112	25.979	2	Female	Marker_34112	Scaffold651	376728	376688
69793	26.09	2	Female	Marker_69793	Scaffold651	639350	639311
11521	26.25	2	Female	Marker_11521	Scaffold12781	146	181
197198	27.555	2	Female	Marker_197198	Scaffold1410	21340	21380
47613	27.59	2	Female	Marker_47613	Scaffold1410	20412	20375
283503	27.598	2	Female	Marker_283503	Scaffold1154	5763	5804
157227	27.894	2	Female	Marker_157227	Scaffold1123	31325	31290
58592	28.772	2	Female	Marker_58592	Scaffold762	8289	8331
226996	29.21	2	Female	Marker_226996	Scaffold106	810195	810156
206218	31.492	2	Female	Marker_206218	Scaffold1813	145179	145143
311534	33.611	2	Female	Marker_311534	Scaffold342	14139	14170
65676	0	20	Female	Marker_65676	Scaffold11	1142120	1142078
268647	0.021	20	Female	Marker_268647	Scaffold28186	446	406
91652	0.036	20	Female	Marker_91652	Scaffold171	530461	530421
324158	0.099	20	Female	Marker_324158	Scaffold2736	28784	28757
84139	0.227	20	Female	Marker_84139	Scaffold207	499350	499319
145093	0.231	20	Female	Marker_145093	Scaffold151	625367	625406
136821	0.299	20	Female	Marker_136821	Scaffold309	177332	177304
51544	0.939	20	Female	Marker_51544	Scaffold207	460501	460458
190256	1.571	20	Female	Marker_190256	Scaffold465	275555	275591
85256	1.879	20	Female	Marker_85256	Scaffold47	253482	253442
198113	2.963	20	Female	Marker_198113	Scaffold2123	17278	17314
104396	3.043	20	Female	Marker_104396	Scaffold2123	81594	81562
95346	3.079	20	Female	Marker_95346	Scaffold2278	68503	68479
279050	3.087	20	Female	Marker_279050	Scaffold2278	30353	30392
45801	4.374	20	Female	Marker_45801	Scaffold497	201817	201793
30126	4.501	20	Female	Marker_30126	Scaffold1132	176452	176497
247636	5.085	20	Female	Marker_247636	Scaffold3923	8998	9038
95517	5.904	20	Female	Marker_95517	Scaffold1358	261305	261344
155355	6.09	20	Female	Marker_155355	Scaffold1358	144951	144911
240172	16.316	20	Female	Marker_240172	Scaffold41	657634	657674
61461	16.789	20	Female	Marker_61461	Scaffold539	93345	93369
91422	17.128	20	Female	Marker_91422	Scaffold4	313482	313446
234954	17.266	20	Female	Marker_234954	Scaffold1263	39208	39169
58127	17.925	20	Female	Marker_58127	Scaffold238	581518	581552
229981	20.469	20	Female	Marker_229981	Scaffold94	248592	248560
155536	20.744	20	Female	Marker_155536	Scaffold141	544746	544786
50467	30.215	20	Female	Marker_50467	Scaffold402	267864	267825
163925	30.67	20	Female	Marker_163925	Scaffold402	429295	429257
88268	30.835	20	Female	Marker_88268	Scaffold402	150017	149975
125735	38.069	20	Female	Marker_125735	Scaffold2322	74624	74584
124672	38.678	20	Female	Marker_124672	Scaffold3453	15385	15358
300672	38.823	20	Female	Marker_300672	Scaffold791	78078	78042
125136	38.943	20	Female	Marker_125136	Scaffold20699	581	542
244559	38.984	20	Female	Marker_244559	Scaffold228	307517	307557
286021	39.038	20	Female	Marker_286021	Scaffold2101	66105	66066
196298	39.055	20	Female	Marker_196298	Scaffold228	191262	191225
278816	39.063	20	Female	Marker_278816	Scaffold1461	50718	50757
130194	39.09	20	Female	Marker_130194	Scaffold1211	129487	129454
56233	39.106	20	Female	Marker_56233	Scaffold12290	1995	1955
159168	39.114	20	Female	Marker_159168	Scaffold716	215214	215248
205770	39.202	20	Female	Marker_205770	Scaffold384	364028	363995
24992	40.368	20	Female	Marker_24992	Scaffold724	25541	25501
194810	40.919	20	Female	Marker_194810	Scaffold3354	4012	4049
187184	42.181	20	Female	Marker_187184	Scaffold430	36564	36531
60624	48.987	20	Female	Marker_60624	Scaffold2384	37691	37651
46366	49.099	20	Female	Marker_46366	Scaffold5097	7991	8025
14271	49.287	20	Female	Marker_14271	Scaffold1178	10900	10861
119189	49.322	20	Female	Marker_119189	Scaffold695	64480	64518
107816	49.326	20	Female	Marker_107816	Scaffold1012	133182	133211
269850	49.367	20	Female	Marker_269850	Scaffold254	137831	137791
104612	49.405	20	Female	Marker_104612	Scaffold576	80260	80220
34433	49.406	20	Female	Marker_34433	Scaffold2834	10858	10825
18729	49.419	20	Female	Marker_18729	Scaffold1732	32811	32787
209456	49.423	20	Female	Marker_209456	Scaffold1790	30853	30813
288619	50.972	20	Female	Marker_288619	Scaffold4982	3535	3575
140825	50.99	20	Female	Marker_140825	Scaffold5501	32050	32091
236803	53.395	20	Female	Marker_236803	Scaffold19811	7845	7878
173229	53.862	20	Female	Marker_173229	Scaffold638	147143	147110
177322	57.014	20	Female	Marker_177322	Scaffold12575	545	569
88170	0	21	Female	Marker_88170	Scaffold22613	7768	7806
175628	0.008	21	Female	Marker_175628	Scaffold76	162166	162197
11896	0.059	21	Female	Marker_11896	Scaffold480	300627	300593
159625	0.071	21	Female	Marker_159625	Scaffold712	140725	140691
208761	0.081	21	Female	Marker_208761	Scaffold1725	292964	292929
237596	0.096	21	Female	Marker_237596	Scaffold712	257029	256989
286836	0.448	21	Female	Marker_286836	Scaffold305	228477	228516
91103	0.475	21	Female	Marker_91103	Scaffold627	63996	64034
11766	0.476	21	Female	Marker_11766	Scaffold712	256689	256652
29349	0.532	21	Female	Marker_29349	Scaffold730	181980	181952
65110	2.717	21	Female	Marker_65110	Scaffold1174	89459	89438
269353	3.063	21	Female	Marker_269353	Scaffold1780	118397	118356
220515	5.134	21	Female	Marker_220515	Scaffold364	82580	82618
276745	5.517	21	Female	Marker_276745	Scaffold276	112117	112080
86322	5.541	21	Female	Marker_86322	Scaffold276	175544	175509
155180	5.762	21	Female	Marker_155180	Scaffold276	394507	394544
49932	7.148	21	Female	Marker_49932	Scaffold3776	11143	11183
40136	7.251	21	Female	Marker_40136	Scaffold2172	55995	55955
244888	7.263	21	Female	Marker_244888	Scaffold11006	537	504
75316	7.267	21	Female	Marker_75316	Scaffold2650	41554	41579
204259	13.265	21	Female	Marker_204259	Scaffold26377	1215	1248
221933	14.686	21	Female	Marker_221933	Scaffold1539	304083	304042
126378	17.008	21	Female	Marker_126378	Scaffold1840	114306	114346
190643	19.573	21	Female	Marker_190643	Scaffold2945	24825	24861
119431	19.711	21	Female	Marker_119431	Scaffold2946	18316	18345
115705	24.07	21	Female	Marker_115705	Scaffold4655	9750	9726
41587	25.381	21	Female	Marker_41587	Scaffold4499	7985	7945
117525	29.585	21	Female	Marker_117525	Scaffold1701	152549	152510
112852	29.842	21	Female	Marker_112852	Scaffold869	41184	41220
312076	30.177	21	Female	Marker_312076	Scaffold869	64060	64023
104170	30.312	21	Female	Marker_104170	Scaffold869	67360	67385
23311	32.217	21	Female	Marker_23311	Scaffold580	164748	164769
40730	32.739	21	Female	Marker_40730	Scaffold2497	78350	78309
234780	32.769	21	Female	Marker_234780	Scaffold76	304770	304797
26071	32.813	21	Female	Marker_26071	Scaffold977	148883	148844
141633	33.184	21	Female	Marker_141633	Scaffold469	24332	24366
135264	33.258	21	Female	Marker_135264	Scaffold408	471204	471244
166575	33.469	21	Female	Marker_166575	Scaffold457	373302	373332
230543	38.643	21	Female	Marker_230543	Scaffold394	49954	49917
133302	38.789	21	Female	Marker_133302	Scaffold394	72182	72146
282759	38.812	21	Female	Marker_282759	Scaffold394	132254	132218
273704	38.824	21	Female	Marker_273704	Scaffold394	63044	63008
149176	39.347	21	Female	Marker_149176	Scaffold394	400589	400622
230795	39.36	21	Female	Marker_230795	Scaffold394	49951	49991
128895	41.863	21	Female	Marker_128895	Scaffold377	361503	361538
130381	45.298	21	Female	Marker_130381	Scaffold338	38358	38395
7407	45.662	21	Female	Marker_7407	Scaffold958	187743	187703
78704	45.911	21	Female	Marker_78704	Scaffold377	28807	28768
7376	45.911	21	Female	Marker_7376	Scaffold513	66383	66343
69815	46.02	21	Female	Marker_69815	Scaffold424	44108	44144
300703	46.038	21	Female	Marker_300703	Scaffold1036	89185	89227
53873	46.042	21	Female	Marker_53873	Scaffold338	639821	639860
149040	46.487	21	Female	Marker_149040	Scaffold4549	28389	28348
150248	50.035	21	Female	Marker_150248	Scaffold469	308668	308632
184769	50.969	21	Female	Marker_184769	Scaffold1059	101784	101749
198741	51.691	21	Female	Marker_198741	Scaffold2180	9910	9942
14876	53.132	21	Female	Marker_14876	Scaffold7075	1556	1517
223147	53.378	21	Female	Marker_223147	Scaffold998	118172	118205
254068	53.76	21	Female	Marker_254068	Scaffold305	361433	361396
214651	53.807	21	Female	Marker_214651	Scaffold201	403923	403962
44012	53.834	21	Female	Marker_44012	Scaffold19403	292	328
15631	58.373	21	Female	Marker_15631	Scaffold1516	106378	106356
130528	58.47	21	Female	Marker_130528	Scaffold352	681641	681602
194112	58.491	21	Female	Marker_194112	Scaffold352	463817	463777
94876	58.514	21	Female	Marker_94876	Scaffold12	1133101	1133065
273461	58.683	21	Female	Marker_273461	Scaffold3242	39817	39777
270385	5.136	3	Female	Marker_270385	Scaffold769	353955	353995
245818	5.216	3	Female	Marker_245818	Scaffold709	56940	56979
145269	6.898	3	Female	Marker_145269	Scaffold503	246586	246627
57372	7.93	3	Female	Marker_57372	Scaffold230	158434	158402
7960	7.951	3	Female	Marker_7960	Scaffold230	22539	22503
323682	7.98	3	Female	Marker_323682	Scaffold230	91029	91070
286895	8	3	Female	Marker_286895	Scaffold14705	73	38
90782	8.899	3	Female	Marker_90782	Scaffold294	291249	291290
61467	9.114	3	Female	Marker_61467	Scaffold7951	233	205
215293	9.238	3	Female	Marker_215293	Scaffold278	65262	65301
161714	9.357	3	Female	Marker_161714	Scaffold2778	48994	49022
101847	9.748	3	Female	Marker_101847	Scaffold856	169378	169415
157036	9.975	3	Female	Marker_157036	Scaffold4793	8152	8173
81389	11.202	3	Female	Marker_81389	Scaffold1102	32055	32094
24782	11.789	3	Female	Marker_24782	Scaffold3416	43712	43752
131412	11.814	3	Female	Marker_131412	Scaffold2262	45646	45678
74671	12.965	3	Female	Marker_74671	Scaffold975	89369	89334
228965	13.313	3	Female	Marker_228965	Scaffold132	592027	591988
45360	13.35	3	Female	Marker_45360	Scaffold132	652984	653021
258546	29.892	3	Female	Marker_258546	Scaffold2969	14545	14509
121929	34.186	3	Female	Marker_121929	Scaffold370	467560	467585
133940	36.662	3	Female	Marker_133940	Scaffold721	56900	56862
39266	38.657	3	Female	Marker_39266	Scaffold1829	70728	70688
174340	38.993	3	Female	Marker_174340	Scaffold2593	11040	10999
121817	39.284	3	Female	Marker_121817	Scaffold1829	96835	96858
151729	39.286	3	Female	Marker_151729	Scaffold450	176466	176433
7166	39.304	3	Female	Marker_7166	Scaffold1829	54856	54896
143370	39.313	3	Female	Marker_143370	Scaffold5494	4450	4410
98137	0	4	Female	Marker_98137	Scaffold1040	94837	94805
128497	0.024	4	Female	Marker_128497	Scaffold1127	94936	94966
89660	0.037	4	Female	Marker_89660	Scaffold6662	1199	1239
72597	0.057	4	Female	Marker_72597	Scaffold1127	87404	87441
202670	0.057	4	Female	Marker_202670	Scaffold5868	11034	11070
78856	0.07	4	Female	Marker_78856	Scaffold5868	5806	5770
259495	0.102	4	Female	Marker_259495	Scaffold1481	129158	129126
141823	0.105	4	Female	Marker_141823	Scaffold726	154768	154801
276705	0.687	4	Female	Marker_276705	Scaffold1681	20508	20468
315966	0.69	4	Female	Marker_315966	Scaffold3593	25432	25471
53112	0.693	4	Female	Marker_53112	Scaffold73	698821	698861
100591	0.694	4	Female	Marker_100591	Scaffold118	60136	60104
47891	0.697	4	Female	Marker_47891	Scaffold1491	152842	152802
174581	0.701	4	Female	Marker_174581	Scaffold772	76702	76675
72371	0.714	4	Female	Marker_72371	Scaffold73	318691	318651
168792	0.737	4	Female	Marker_168792	Scaffold22424	330	369
146067	0.737	4	Female	Marker_146067	Scaffold851	108085	108044
122699	0.739	4	Female	Marker_122699	Scaffold1541	84106	84146
283172	0.747	4	Female	Marker_283172	Scaffold2070	95491	95463
84677	0.756	4	Female	Marker_84677	Scaffold524	144291	144252
15791	0.757	4	Female	Marker_15791	Scaffold1722	63602	63640
179491	0.769	4	Female	Marker_179491	Scaffold822	85205	85170
84679	1.096	4	Female	Marker_84679	Scaffold343	718399	718439
291573	1.107	4	Female	Marker_291573	Scaffold1895	7528	7491
88017	1.108	4	Female	Marker_88017	Scaffold1011	22017	22056
157937	1.127	4	Female	Marker_157937	Scaffold2240	49675	49641
115891	1.144	4	Female	Marker_115891	Scaffold1127	13495	13461
18942	1.168	4	Female	Marker_18942	Scaffold1127	8388	8422
49819	1.328	4	Female	Marker_49819	Scaffold3667	28391	28420
229122	2.718	4	Female	Marker_229122	Scaffold179	584250	584223
43770	2.843	4	Female	Marker_43770	Scaffold179	533264	533233
222757	4.117	4	Female	Marker_222757	Scaffold496	89749	89707
238327	4.181	4	Female	Marker_238327	Scaffold3076	9660	9621
247875	12.823	4	Female	Marker_247875	Scaffold2565	83957	83917
82174	12.828	4	Female	Marker_82174	Scaffold1596	26805	26765
114918	13.468	4	Female	Marker_114918	Scaffold2337	74712	74676
172156	15.425	4	Female	Marker_172156	Scaffold605	446090	446130
111396	17.996	4	Female	Marker_111396	Scaffold3493	5244	5212
228622	18.27	4	Female	Marker_228622	Scaffold1738	61715	61675
244335	18.537	4	Female	Marker_244335	Scaffold605	281480	281445
303037	20.624	4	Female	Marker_303037	Scaffold531	37892	37852
315144	21.421	4	Female	Marker_315144	Scaffold1049	3985	4006
315547	35.577	4	Female	Marker_315547	Scaffold8592	805	765
220133	39.114	4	Female	Marker_220133	Scaffold51	321466	321511
5545	39.929	4	Female	Marker_5545	Scaffold289	336158	336198
213103	44.319	4	Female	Marker_213103	Scaffold3616	61139	61179
227279	45.652	4	Female	Marker_227279	Scaffold320	275045	275084
6542	45.799	4	Female	Marker_6542	Scaffold1407	82447	82481
235890	45.839	4	Female	Marker_235890	Scaffold644	185067	185106
248547	45.856	4	Female	Marker_248547	Scaffold320	274750	274712
140534	46.016	4	Female	Marker_140534	Scaffold983	141099	141139
186455	46.056	4	Female	Marker_186455	Scaffold2707	24130	24170
184417	46.255	4	Female	Marker_184417	Scaffold214	19953	19914
14026	46.674	4	Female	Marker_14026	Scaffold4065	7025	6984
250067	47.359	4	Female	Marker_250067	Scaffold879	89448	89416
236072	48.761	4	Female	Marker_236072	Scaffold2189	36732	36771
186729	0	5	Female	Marker_186729	Scaffold88	257390	257357
42529	1.235	5	Female	Marker_42529	Scaffold986	166900	166860
225469	1.252	5	Female	Marker_225469	Scaffold463	328301	328261
83828	1.288	5	Female	Marker_83828	Scaffold885	82588	82628
141228	1.431	5	Female	Marker_141228	Scaffold711	29997	29957
205448	1.49	5	Female	Marker_205448	Scaffold2656	27118	27078
229481	2.548	5	Female	Marker_229481	Scaffold35	465973	465927
31192	30.304	5	Female	Marker_31192	Scaffold421	80687	80647
259227	32.699	5	Female	Marker_259227	Scaffold561	574803	574843
166731	36.568	5	Female	Marker_166731	Scaffold327	261346	261315
76602	36.586	5	Female	Marker_76602	Scaffold327	274559	274521
43169	36.617	5	Female	Marker_43169	Scaffold2255	58174	58212
128159	36.798	5	Female	Marker_128159	Scaffold7548	655	681
192262	37.143	5	Female	Marker_192262	Scaffold409	267517	267488
79201	37.549	5	Female	Marker_79201	Scaffold1306	55207	55173
331735	38.727	5	Female	Marker_331735	Scaffold7637	7840	7809
234436	38.734	5	Female	Marker_234436	Scaffold532	61817	61854
132240	38.738	5	Female	Marker_132240	Scaffold96	391569	391537
36257	38.745	5	Female	Marker_36257	Scaffold673	278118	278149
51799	38.757	5	Female	Marker_51799	Scaffold673	330224	330265
75091	38.759	5	Female	Marker_75091	Scaffold532	62874	62914
212849	38.764	5	Female	Marker_212849	Scaffold532	15554	15575
262221	38.825	5	Female	Marker_262221	Scaffold204	879755	879715
64234	38.866	5	Female	Marker_64234	Scaffold1684	61412	61376
307713	38.909	5	Female	Marker_307713	Scaffold1684	178270	178310
102664	38.91	5	Female	Marker_102664	Scaffold1633	107183	107221
69210	38.91	5	Female	Marker_69210	Scaffold532	126796	126836
14541	38.915	5	Female	Marker_14541	Scaffold197	764522	764562
237445	38.918	5	Female	Marker_237445	Scaffold4625	13470	13440
6924	38.932	5	Female	Marker_6924	Scaffold197	158742	158708
280005	38.96	5	Female	Marker_280005	Scaffold1357	19028	19052
108989	38.96	5	Female	Marker_108989	Scaffold479	512911	512951
12923	38.975	5	Female	Marker_12923	Scaffold1221	93588	93548
81822	38.977	5	Female	Marker_81822	Scaffold1221	274949	274921
81746	38.98	5	Female	Marker_81746	Scaffold1024	85016	84983
238301	39.095	5	Female	Marker_238301	Scaffold3148	12312	12275
200978	39.168	5	Female	Marker_200978	Scaffold673	129756	129794
122255	39.255	5	Female	Marker_122255	Scaffold3968	11785	11756
117838	39.263	5	Female	Marker_117838	Scaffold280	712008	711968
338795	39.27	5	Female	Marker_338795	Scaffold96	551282	551322
171016	39.271	5	Female	Marker_171016	Scaffold2449	17300	17260
28141	39.278	5	Female	Marker_28141	Scaffold2731	25186	25146
218341	39.279	5	Female	Marker_218341	Scaffold3703	60078	60046
32455	39.279	5	Female	Marker_32455	Scaffold545	297831	297803
238976	39.286	5	Female	Marker_238976	Scaffold96	484184	484144
307129	39.293	5	Female	Marker_307129	Scaffold129	315305	315266
151601	39.295	5	Female	Marker_151601	Scaffold1104	302286	302319
188046	39.629	5	Female	Marker_188046	Scaffold689	359402	359362
165338	46.249	5	Female	Marker_165338	Scaffold70	169998	170026
71892	46.759	5	Female	Marker_71892	Scaffold688	496399	496359
294515	46.767	5	Female	Marker_294515	Scaffold70	1024249	1024208
47449	46.857	5	Female	Marker_47449	Scaffold907	418255	418215
233317	46.895	5	Female	Marker_233317	Scaffold688	18183	18223
10016	46.901	5	Female	Marker_10016	Scaffold70	520343	520379
21717	47.079	5	Female	Marker_21717	Scaffold70	1075877	1075912
76914	47.345	5	Female	Marker_76914	Scaffold18	291592	291628
27129	47.441	5	Female	Marker_27129	Scaffold1220	146894	146934
99907	47.485	5	Female	Marker_99907	Scaffold18	421730	421696
235752	47.501	5	Female	Marker_235752	Scaffold688	251637	251673
54898	47.517	5	Female	Marker_54898	Scaffold70	532128	532092
253693	47.561	5	Female	Marker_253693	Scaffold1871	45904	45868
253435	47.574	5	Female	Marker_253435	Scaffold1142	64675	64637
19623	47.614	5	Female	Marker_19623	Scaffold1871	163437	163471
198321	0.063	6	Female	Marker_198321	Scaffold44	546329	546361
27720	0.907	6	Female	Marker_27720	Scaffold181	82505	82469
23620	0.92	6	Female	Marker_23620	Scaffold44	76723	76760
107018	0.922	6	Female	Marker_107018	Scaffold20415	256	218
22737	0.932	6	Female	Marker_22737	Scaffold37	83318	83358
29731	0.934	6	Female	Marker_29731	Scaffold1108	61047	61012
337650	0.939	6	Female	Marker_337650	Scaffold2212	41469	41501
50899	0.957	6	Female	Marker_50899	Scaffold33	1274385	1274360
193478	0.971	6	Female	Marker_193478	Scaffold617	244142	244102
214956	0.982	6	Female	Marker_214956	Scaffold170	471780	471755
280224	0.988	6	Female	Marker_280224	Scaffold5988	1663	1702
271737	0.997	6	Female	Marker_271737	Scaffold33	613760	613786
21784	1.013	6	Female	Marker_21784	Scaffold2063	149539	149498
50816	1.017	6	Female	Marker_50816	Scaffold33	1065456	1065490
142424	1.026	6	Female	Marker_142424	Scaffold601	397825	397792
341815	1.028	6	Female	Marker_341815	Scaffold1703	20552	20586
142448	1.028	6	Female	Marker_142448	Scaffold37	543626	543666
262595	1.031	6	Female	Marker_262595	Scaffold181	127518	127497
58439	1.035	6	Female	Marker_58439	Scaffold10072	3845	3880
53583	1.037	6	Female	Marker_53583	Scaffold814	56023	56062
180664	1.04	6	Female	Marker_180664	Scaffold33	719112	719149
149036	1.043	6	Female	Marker_149036	Scaffold1083	15406	15443
318103	1.046	6	Female	Marker_318103	Scaffold2292	28797	28758
295238	1.046	6	Female	Marker_295238	Scaffold60	572222	572185
8393	1.051	6	Female	Marker_8393	Scaffold498	207317	207355
262142	1.051	6	Female	Marker_262142	Scaffold498	81584	81554
227263	1.051	6	Female	Marker_227263	Scaffold567	13862	13889
126647	1.055	6	Female	Marker_126647	Scaffold3714	17157	17186
39351	1.06	6	Female	Marker_39351	Scaffold44	180349	180387
305610	1.063	6	Female	Marker_305610	Scaffold1099	164570	164534
204279	1.067	6	Female	Marker_204279	Scaffold3930	12310	12276
168691	1.07	6	Female	Marker_168691	Scaffold1703	17627	17590
42803	1.072	6	Female	Marker_42803	Scaffold2931	49593	49568
195577	1.084	6	Female	Marker_195577	Scaffold1084	233269	233241
263712	1.095	6	Female	Marker_263712	Scaffold37	196058	196097
131270	1.134	6	Female	Marker_131270	Scaffold181	137624	137584
80973	1.219	6	Female	Marker_80973	Scaffold1952	47696	47736
41224	1.221	6	Female	Marker_41224	Scaffold1942	110979	111017
266314	1.334	6	Female	Marker_266314	Scaffold1673	148887	148849
34148	2.542	6	Female	Marker_34148	Scaffold44	867617	867652
188542	7.985	6	Female	Marker_188542	Scaffold75	325045	325075
128787	9.028	6	Female	Marker_128787	Scaffold75	622020	621981
189818	9.074	6	Female	Marker_189818	Scaffold75	429122	429162
33484	9.496	6	Female	Marker_33484	Scaffold44	1020491	1020466
164194	10.842	6	Female	Marker_164194	Scaffold1911	73441	73478
191357	11.11	6	Female	Marker_191357	Scaffold17	426024	426064
132327	11.561	6	Female	Marker_132327	Scaffold1715	54954	54915
167120	11.617	6	Female	Marker_167120	Scaffold17	838187	838157
294707	11.671	6	Female	Marker_294707	Scaffold17	188338	188378
293531	11.742	6	Female	Marker_293531	Scaffold1714	29407	29372
96515	11.81	6	Female	Marker_96515	Scaffold669	267309	267269
126734	11.851	6	Female	Marker_126734	Scaffold17	524441	524469
260009	12.271	6	Female	Marker_260009	Scaffold17	417904	417872
300226	14.184	6	Female	Marker_300226	Scaffold1340	174560	174520
148750	15.183	6	Female	Marker_148750	Scaffold373	299987	300023
125731	15.523	6	Female	Marker_125731	Scaffold1037	65568	65595
15242	20.041	6	Female	Marker_15242	Scaffold139	403477	403437
67460	20.696	6	Female	Marker_67460	Scaffold1613	213329	213373
184771	20.74	6	Female	Marker_184771	Scaffold1047	271097	271132
213582	20.851	6	Female	Marker_213582	Scaffold1964	93137	93177
167564	21.099	6	Female	Marker_167564	Scaffold1972	55682	55644
255390	23.918	6	Female	Marker_255390	Scaffold1969	4566	4536
53561	24.106	6	Female	Marker_53561	Scaffold722	75638	75677
94698	24.165	6	Female	Marker_94698	Scaffold3640	43422	43391
268211	24.21	6	Female	Marker_268211	Scaffold1604	27826	27805
79549	24.357	6	Female	Marker_79549	Scaffold3149	67781	67821
91099	24.448	6	Female	Marker_91099	Scaffold2488	21012	21048
224656	34.082	6	Female	Marker_224656	Scaffold1281	158096	158133
98667	34.322	6	Female	Marker_98667	Scaffold96	75856	75816
194180	34.359	6	Female	Marker_194180	Scaffold5521	5501	5463
288371	34.406	6	Female	Marker_288371	Scaffold696	261807	261770
96199	34.41	6	Female	Marker_96199	Scaffold278	457409	457447
7080	34.533	6	Female	Marker_7080	Scaffold291	20423	20387
174448	34.568	6	Female	Marker_174448	Scaffold1069	188977	189015
258117	34.778	6	Female	Marker_258117	Scaffold164	111286	111246
53706	34.857	6	Female	Marker_53706	Scaffold1183	162902	162864
301276	35.033	6	Female	Marker_301276	Scaffold1281	36312	36341
157157	35.048	6	Female	Marker_157157	Scaffold1281	115722	115685
226719	35.153	6	Female	Marker_226719	Scaffold2455	28671	28712
81741	38.508	6	Female	Marker_81741	Scaffold1212	115831	115790
269416	38.641	6	Female	Marker_269416	Scaffold1212	33808	33768
9909	38.642	6	Female	Marker_9909	Scaffold1008	168309	168278
70475	38.738	6	Female	Marker_70475	Scaffold1008	160068	160100
33858	42.509	6	Female	Marker_33858	Scaffold168	552650	552687
162510	42.804	6	Female	Marker_162510	Scaffold1930	98527	98490
24253	42.812	6	Female	Marker_24253	Scaffold679	111277	111312
182568	42.921	6	Female	Marker_182568	Scaffold3	1647046	1647086
337879	42.972	6	Female	Marker_337879	Scaffold2011	125574	125538
106242	42.976	6	Female	Marker_106242	Scaffold1855	46549	46512
20713	42.994	6	Female	Marker_20713	Scaffold773	83061	83093
306325	43.05	6	Female	Marker_306325	Scaffold1634	114276	114236
81838	43.053	6	Female	Marker_81838	Scaffold1008	55365	55323
103097	43.065	6	Female	Marker_103097	Scaffold4745	30748	30788
94346	43.068	6	Female	Marker_94346	Scaffold4745	16638	16679
310666	43.07	6	Female	Marker_310666	Scaffold220	88044	88073
68962	43.072	6	Female	Marker_68962	Scaffold2641	7960	7991
32536	43.074	6	Female	Marker_32536	Scaffold414	69010	69046
58769	43.08	6	Female	Marker_58769	Scaffold1855	22280	22243
128145	43.081	6	Female	Marker_128145	Scaffold414	139517	139553
231094	43.082	6	Female	Marker_231094	Scaffold631	426443	426403
195337	43.099	6	Female	Marker_195337	Scaffold199	241181	241141
41350	44.404	6	Female	Marker_41350	Scaffold3731	10558	10598
25489	44.452	6	Female	Marker_25489	Scaffold313	324278	324242
155867	44.687	6	Female	Marker_155867	Scaffold733	156104	156064
94110	44.791	6	Female	Marker_94110	Scaffold1806	71055	71018
321324	46.113	6	Female	Marker_321324	Scaffold1283	101204	101174
27534	46.173	6	Female	Marker_27534	Scaffold313	500915	500875
311706	46.243	6	Female	Marker_311706	Scaffold686	216198	216233
314859	47.29	6	Female	Marker_314859	Scaffold371	522312	522351
87756	47.363	6	Female	Marker_87756	Scaffold31397	918	945
129660	49.574	6	Female	Marker_129660	Scaffold770	27585	27615
199813	0.129	7	Female	Marker_199813	Scaffold4937	6551	6581
85079	0.172	7	Female	Marker_85079	Scaffold1687	54990	54969
81775	0.3	7	Female	Marker_81775	Scaffold102	526728	526757
44023	0.355	7	Female	Marker_44023	Scaffold2142	133549	133517
313340	0.361	7	Female	Marker_313340	Scaffold1881	79064	79092
82263	0.659	7	Female	Marker_82263	Scaffold2327	26471	26502
145688	1.084	7	Female	Marker_145688	Scaffold1322	45980	46010
85638	1.102	7	Female	Marker_85638	Scaffold3877	17551	17516
96131	1.165	7	Female	Marker_96131	Scaffold2790	32375	32337
33970	1.459	7	Female	Marker_33970	Scaffold462	424047	424015
143003	2.575	7	Female	Marker_143003	Scaffold2246	735	760
95753	2.902	7	Female	Marker_95753	Scaffold1769	35522	35557
247611	2.908	7	Female	Marker_247611	Scaffold293	416648	416688
97986	2.91	7	Female	Marker_97986	Scaffold293	101229	101189
279105	3.057	7	Female	Marker_279105	Scaffold2336	8647	8687
2572	3.096	7	Female	Marker_2572	Scaffold973	135600	135560
229814	3.125	7	Female	Marker_229814	Scaffold293	353686	353721
65687	3.134	7	Female	Marker_65687	Scaffold507	228232	228266
248205	3.175	7	Female	Marker_248205	Scaffold3112	31852	31889
204468	3.199	7	Female	Marker_204468	Scaffold72	80123	80156
36293	3.269	7	Female	Marker_36293	Scaffold293	169359	169397
45217	3.337	7	Female	Marker_45217	Scaffold3112	21680	21717
146679	3.376	7	Female	Marker_146679	Scaffold2124	32283	32312
279756	4.34	7	Female	Marker_279756	Scaffold2414	5940	5979
28481	4.405	7	Female	Marker_28481	Scaffold16325	1074	1052
6013	4.412	7	Female	Marker_6013	Scaffold262	451408	451368
36785	4.701	7	Female	Marker_36785	Scaffold1390	18454	18420
108011	6.526	7	Female	Marker_108011	Scaffold15	262605	262645
95094	6.559	7	Female	Marker_95094	Scaffold15	94841	94872
140253	7.13	7	Female	Marker_140253	Scaffold615	166492	166532
261304	7.442	7	Female	Marker_261304	Scaffold516	139198	139232
249377	7.554	7	Female	Marker_249377	Scaffold665	62069	62031
175244	7.556	7	Female	Marker_175244	Scaffold2237	65814	65774
187046	7.558	7	Female	Marker_187046	Scaffold615	172075	172113
159676	7.596	7	Female	Marker_159676	Scaffold2487	9870	9903
185946	7.782	7	Female	Marker_185946	Scaffold15	140671	140699
147291	11.032	7	Female	Marker_147291	Scaffold444	443157	443117
21848	11.041	7	Female	Marker_21848	Scaffold1172	86975	87013
273875	11.044	7	Female	Marker_273875	Scaffold516	438896	438858
103003	11.064	7	Female	Marker_103003	Scaffold8429	7183	7221
186344	11.097	7	Female	Marker_186344	Scaffold137	92386	92348
62794	11.141	7	Female	Marker_62794	Scaffold137	184730	184690
64156	11.31	7	Female	Marker_64156	Scaffold15	537593	537552
83357	11.366	7	Female	Marker_83357	Scaffold516	469042	469081
315398	11.546	7	Female	Marker_315398	Scaffold444	584422	584462
7355	11.972	7	Female	Marker_7355	Scaffold15	705854	705881
52984	12.335	7	Female	Marker_52984	Scaffold3119	51034	51000
300188	12.55	7	Female	Marker_300188	Scaffold1853	2743	2778
107877	13.885	7	Female	Marker_107877	Scaffold1622	76792	76754
308186	20.41	7	Female	Marker_308186	Scaffold103	523708	523669
262982	21.138	7	Female	Marker_262982	Scaffold26406	1546	1507
105517	21.452	7	Female	Marker_105517	Scaffold3392	22959	22931
231363	21.469	7	Female	Marker_231363	Scaffold4729	12857	12829
297957	21.531	7	Female	Marker_297957	Scaffold2023	16918	16950
117082	21.83	7	Female	Marker_117082	Scaffold103	372679	372719
242029	22.019	7	Female	Marker_242029	Scaffold103	292075	292112
291007	23.183	7	Female	Marker_291007	Scaffold17270	92	123
59354	24.084	7	Female	Marker_59354	Scaffold556	240303	240272
71664	24.5	7	Female	Marker_71664	Scaffold556	240310	240343
195316	24.564	7	Female	Marker_195316	Scaffold1894	51907	51933
206823	24.752	7	Female	Marker_206823	Scaffold2271	22415	22443
171291	25.379	7	Female	Marker_171291	Scaffold3107	87609	87648
176545	27.701	7	Female	Marker_176545	Scaffold12716	9130	9151
144465	28.066	7	Female	Marker_144465	Scaffold2563	70662	70638
181619	28.569	7	Female	Marker_181619	Scaffold21	253876	253906
202026	37.168	7	Female	Marker_202026	Scaffold21	640594	640555
253634	37.289	7	Female	Marker_253634	Scaffold21	905688	905725
92093	37.392	7	Female	Marker_92093	Scaffold21	1008576	1008536
62552	38.05	7	Female	Marker_62552	Scaffold21	721316	721279
26653	38.388	7	Female	Marker_26653	Scaffold1426	111680	111645
36334	40.905	7	Female	Marker_36334	Scaffold31856	17205	17167
266614	40.921	7	Female	Marker_266614	Scaffold2951	34799	34760
156754	41.378	7	Female	Marker_156754	Scaffold12042	1280	1247
17319	42.241	7	Female	Marker_17319	Scaffold3404	57184	57143
196897	42.559	7	Female	Marker_196897	Scaffold940	54512	54552
260962	46.467	7	Female	Marker_260962	Scaffold3358	15084	15051
66485	46.709	7	Female	Marker_66485	Scaffold61	428646	428682
57745	46.724	7	Female	Marker_57745	Scaffold2135	54382	54417
107687	46.745	7	Female	Marker_107687	Scaffold1947	78853	78823
7949	46.766	7	Female	Marker_7949	Scaffold102	502403	502366
150893	46.789	7	Female	Marker_150893	Scaffold102	508947	508987
152927	46.821	7	Female	Marker_152927	Scaffold102	337966	337930
143635	47.663	7	Female	Marker_143635	Scaffold2182	82706	82666
85486	47.788	7	Female	Marker_85486	Scaffold485	263217	263257
19833	48.005	7	Female	Marker_19833	Scaffold593	73496	73463
75491	48.008	7	Female	Marker_75491	Scaffold485	377390	377352
212868	48.025	7	Female	Marker_212868	Scaffold1058	369896	369935
103712	48.068	7	Female	Marker_103712	Scaffold1758	39726	39686
38308	48.09	7	Female	Marker_38308	Scaffold1837	41826	41863
325965	48.141	7	Female	Marker_325965	Scaffold165	454808	454848
228870	48.224	7	Female	Marker_228870	Scaffold789	90862	90898
44924	48.248	7	Female	Marker_44924	Scaffold1546	645	674
3450	48.255	7	Female	Marker_3450	Scaffold25258	296	329
232436	0.037	8	Female	Marker_232436	Scaffold16839	4005	4032
104525	0.099	8	Female	Marker_104525	Scaffold508	82542	82578
211733	0.14	8	Female	Marker_211733	Scaffold3206	2830	2791
34333	0.161	8	Female	Marker_34333	Scaffold3967	56046	56079
65011	0.219	8	Female	Marker_65011	Scaffold719	110786	110746
234735	0.221	8	Female	Marker_234735	Scaffold2252	52490	52454
188548	0.292	8	Female	Marker_188548	Scaffold2007	82351	82314
48855	0.458	8	Female	Marker_48855	Scaffold1990	7692	7653
40561	0.526	8	Female	Marker_40561	Scaffold2479	68512	68474
28143	1.536	8	Female	Marker_28143	Scaffold558	428755	428715
91141	1.715	8	Female	Marker_91141	Scaffold31	730753	730793
245799	1.735	8	Female	Marker_245799	Scaffold558	361639	361680
116550	5.97	8	Female	Marker_116550	Scaffold703	273469	273499
319381	6.012	8	Female	Marker_319381	Scaffold31	788346	788312
187991	6.325	8	Female	Marker_187991	Scaffold804	6081	6122
72484	6.524	8	Female	Marker_72484	Scaffold2244	61604	61642
108271	6.551	8	Female	Marker_108271	Scaffold14945	547	580
179277	6.639	8	Female	Marker_179277	Scaffold804	16410	16440
67514	6.732	8	Female	Marker_67514	Scaffold2693	28702	28673
109051	6.898	8	Female	Marker_109051	Scaffold804	157966	158002
248842	7.306	8	Female	Marker_248842	Scaffold1321	89809	89772
113543	8.777	8	Female	Marker_113543	Scaffold1289	44085	44123
51703	8.783	8	Female	Marker_51703	Scaffold5160	80	41
120379	9.002	8	Female	Marker_120379	Scaffold2021	192135	192175
326334	9.652	8	Female	Marker_326334	Scaffold1289	76017	76056
132649	10.95	8	Female	Marker_132649	Scaffold1289	370218	370254
122540	11.434	8	Female	Marker_122540	Scaffold1289	390966	390926
132028	16.326	8	Female	Marker_132028	Scaffold918	70907	70869
152035	16.535	8	Female	Marker_152035	Scaffold2148	178270	178310
249186	16.543	8	Female	Marker_249186	Scaffold2258	160	188
266881	16.582	8	Female	Marker_266881	Scaffold584	41281	41241
73479	16.619	8	Female	Marker_73479	Scaffold1371	40157	40124
310168	16.846	8	Female	Marker_310168	Scaffold1226	21347	21308
244594	16.928	8	Female	Marker_244594	Scaffold1226	139131	139164
299882	16.933	8	Female	Marker_299882	Scaffold1226	107862	107832
149729	17.07	8	Female	Marker_149729	Scaffold2535	183015	183055
234803	17.317	8	Female	Marker_234803	Scaffold3410	17671	17643
6769	17.413	8	Female	Marker_6769	Scaffold368	177564	177604
21746	17.455	8	Female	Marker_21746	Scaffold331	98712	98752
238997	19.5	8	Female	Marker_238997	Scaffold1438	95275	95319
148829	19.597	8	Female	Marker_148829	Scaffold11245	1931	1899
225300	19.85	8	Female	Marker_225300	Scaffold3021	77347	77323
46681	22.104	8	Female	Marker_46681	Scaffold360	353059	353099
103915	22.155	8	Female	Marker_103915	Scaffold360	504887	504927
105105	22.523	8	Female	Marker_105105	Scaffold8922	2649	2684
266842	22.537	8	Female	Marker_266842	Scaffold360	64905	64944
60451	22.623	8	Female	Marker_60451	Scaffold20194	1002	965
121764	22.713	8	Female	Marker_121764	Scaffold360	128407	128372
320728	22.718	8	Female	Marker_320728	Scaffold360	504884	504856
33417	22.758	8	Female	Marker_33417	Scaffold360	152979	152941
201255	23.252	8	Female	Marker_201255	Scaffold360	303946	303985
92123	23.431	8	Female	Marker_92123	Scaffold1214	136323	136360
20471	23.992	8	Female	Marker_20471	Scaffold426	513659	513685
175720	24.068	8	Female	Marker_175720	Scaffold3237	8044	8007
268537	24.1	8	Female	Marker_268537	Scaffold606	307203	307243
43638	24.181	8	Female	Marker_43638	Scaffold1321	20459	20419
219283	24.214	8	Female	Marker_219283	Scaffold606	350201	350159
13336	24.332	8	Female	Marker_13336	Scaffold1405	36677	36637
59773	24.348	8	Female	Marker_59773	Scaffold611	282040	282079
269330	24.417	8	Female	Marker_269330	Scaffold1537	4569	4604
5548	24.487	8	Female	Marker_5548	Scaffold426	443568	443604
183748	24.496	8	Female	Marker_183748	Scaffold334	31024	30987
287127	24.699	8	Female	Marker_287127	Scaffold13437	451	480
264914	30.615	8	Female	Marker_264914	Scaffold2102	56595	56570
132856	31.455	8	Female	Marker_132856	Scaffold208	75154	75194
146249	31.901	8	Female	Marker_146249	Scaffold864	275170	275139
74186	32	8	Female	Marker_74186	Scaffold5387	3830	3861
170357	32.477	8	Female	Marker_170357	Scaffold15931	567	534
120720	32.638	8	Female	Marker_120720	Scaffold3308	12671	12643
34656	33.101	8	Female	Marker_34656	Scaffold433	157306	157267
132154	33.218	8	Female	Marker_132154	Scaffold433	187196	187159
96730	34.804	8	Female	Marker_96730	Scaffold1998	20260	20291
329012	35.111	8	Female	Marker_329012	Scaffold1998	26223	26263
107393	35.279	8	Female	Marker_107393	Scaffold2471	70641	70679
61711	35.466	8	Female	Marker_61711	Scaffold1314	55850	55824
130452	36.372	8	Female	Marker_130452	Scaffold1028	35665	35625
231257	36.562	8	Female	Marker_231257	Scaffold1524	120442	120483
321329	45.532	8	Female	Marker_321329	Scaffold187	526486	526456
236057	45.839	8	Female	Marker_236057	Scaffold187	411986	411946
210755	46.04	8	Female	Marker_210755	Scaffold187	755768	755732
177528	46.163	8	Female	Marker_177528	Scaffold790	204478	204514
166664	46.68	8	Female	Marker_166664	Scaffold1996	34330	34290
112501	46.785	8	Female	Marker_112501	Scaffold187	843126	843087
229700	47.113	8	Female	Marker_229700	Scaffold187	427740	427780
242085	47.344	8	Female	Marker_242085	Scaffold187	452185	452221
158521	51.239	8	Female	Marker_158521	Scaffold187	352706	352741
179064	52.087	8	Female	Marker_179064	Scaffold288	143926	143886
66165	52.316	8	Female	Marker_66165	Scaffold172	107042	107082
10456	52.748	8	Female	Marker_10456	Scaffold880	432676	432638
91064	53.443	8	Female	Marker_91064	Scaffold1017	94461	94501
273831	54.136	8	Female	Marker_273831	Scaffold850	185978	185946
72367	54.884	8	Female	Marker_72367	Scaffold1744	3009	2971
122639	54.92	8	Female	Marker_122639	Scaffold3444	25965	25994
32084	55.307	8	Female	Marker_32084	Scaffold825	44514	44555
82418	55.335	8	Female	Marker_82418	Scaffold850	74504	74464
252428	55.402	8	Female	Marker_252428	Scaffold2119	12358	12318
89817	55.52	8	Female	Marker_89817	Scaffold825	142825	142786
117830	55.612	8	Female	Marker_117830	Scaffold1129	79241	79201
131373	55.69	8	Female	Marker_131373	Scaffold1052	112217	112250
32328	55.733	8	Female	Marker_32328	Scaffold302	77183	77222
88607	1.434	9	Female	Marker_88607	Scaffold17682	666	640
228309	1.444	9	Female	Marker_228309	Scaffold4904	9764	9726
228218	1.451	9	Female	Marker_228218	Scaffold2192	3875	3915
181754	1.452	9	Female	Marker_181754	Scaffold203	304688	304650
25111	1.458	9	Female	Marker_25111	Scaffold6771	191	223
152183	1.605	9	Female	Marker_152183	Scaffold4008	25506	25544
122600	2.449	9	Female	Marker_122600	Scaffold383	571591	571626
288850	5.505	9	Female	Marker_288850	Scaffold84	617039	617079
215588	8.175	9	Female	Marker_215588	Scaffold1617	26583	26546
45566	8.397	9	Female	Marker_45566	Scaffold2771	79291	79254
264071	8.659	9	Female	Marker_264071	Scaffold5632	2214	2235
237449	8.661	9	Female	Marker_237449	Scaffold2437	18061	18098
160826	8.685	9	Female	Marker_160826	Scaffold533	15106	15144
121845	8.688	9	Female	Marker_121845	Scaffold314	484801	484770
262180	8.696	9	Female	Marker_262180	Scaffold738	340476	340438
127488	8.708	9	Female	Marker_127488	Scaffold1617	90524	90564
216677	8.709	9	Female	Marker_216677	Scaffold314	533428	533389
329952	8.709	9	Female	Marker_329952	Scaffold923	120650	120684
56096	8.714	9	Female	Marker_56096	Scaffold2630	11718	11758
78924	8.717	9	Female	Marker_78924	Scaffold314	570005	569964
229958	8.726	9	Female	Marker_229958	Scaffold314	373558	373525
256430	8.741	9	Female	Marker_256430	Scaffold314	481317	481348
178040	8.748	9	Female	Marker_178040	Scaffold34	929285	929242
163273	8.794	9	Female	Marker_163273	Scaffold923	81816	81853
123108	8.842	9	Female	Marker_123108	Scaffold2261	32637	32660
60467	9.179	9	Female	Marker_60467	Scaffold21432	264	226
54160	9.188	9	Female	Marker_54160	Scaffold1803	111467	111433
175393	10.09	9	Female	Marker_175393	Scaffold2630	10929	10892
100757	10.175	9	Female	Marker_100757	Scaffold186	754168	754135
213235	10.197	9	Female	Marker_213235	Scaffold27601	1289	1325
191428	10.217	9	Female	Marker_191428	Scaffold186	333905	333871
275057	10.279	9	Female	Marker_275057	Scaffold186	916783	916750
107004	10.356	9	Female	Marker_107004	Scaffold1368	85546	85507
244613	10.402	9	Female	Marker_244613	Scaffold186	899185	899224
180131	10.716	9	Female	Marker_180131	Scaffold186	634481	634441
88291	11.324	9	Female	Marker_88291	Scaffold436	265993	265956
89182	11.345	9	Female	Marker_89182	Scaffold3487	24759	24787
203045	12.748	9	Female	Marker_203045	Scaffold740	56172	56208
299148	12.795	9	Female	Marker_299148	Scaffold216	430632	430672
322391	12.979	9	Female	Marker_322391	Scaffold427	221411	221373
57390	13.028	9	Female	Marker_57390	Scaffold23	880441	880402
66309	13.056	9	Female	Marker_66309	Scaffold740	56175	56142
69900	13.091	9	Female	Marker_69900	Scaffold216	198827	198866
69654	13.125	9	Female	Marker_69654	Scaffold23	889559	889524
264689	13.168	9	Female	Marker_264689	Scaffold216	172423	172462
233260	13.232	9	Female	Marker_233260	Scaffold216	75351	75314
91073	13.382	9	Female	Marker_91073	Scaffold216	276348	276316
237439	15.319	9	Female	Marker_237439	Scaffold926	97500	97473
99658	15.926	9	Female	Marker_99658	Scaffold216	708467	708430
168967	16.243	9	Female	Marker_168967	Scaffold30453	352	392
148673	22.063	9	Female	Marker_148673	Scaffold11968	568	531
153304	23.875	9	Female	Marker_153304	Scaffold4849	5137	5097
72583	24.969	9	Female	Marker_72583	Scaffold23	870470	870509
16588	25.289	9	Female	Marker_16588	Scaffold461	73733	73704
126148	27.526	9	Female	Marker_126148	Scaffold2660	2567	2537
180066	28.769	9	Female	Marker_180066	Scaffold375	276251	276291
224757	34.219	9	Female	Marker_224757	Scaffold473	521523	521483
304237	34.363	9	Female	Marker_304237	Scaffold1485	196972	197013
95310	34.45	9	Female	Marker_95310	Scaffold62	298824	298863
116187	34.513	9	Female	Marker_116187	Scaffold406	362742	362704
37495	34.599	9	Female	Marker_37495	Scaffold504	81735	81699
185464	34.674	9	Female	Marker_185464	Scaffold422	761547	761510
156259	35.477	9	Female	Marker_156259	Scaffold3311	15691	15657
148550	35.742	9	Female	Marker_148550	Scaffold566	105456	105496
77012	35.742	9	Female	Marker_77012	Scaffold694	112709	112685
454781	0	1	Male	Marker_454781	Scaffold1074	184498	184456
454735	0.697	1	Male	Marker_454735	Scaffold177	138094	138131
458798	1.432	1	Male	Marker_458798	Scaffold3475	15340	15381
653717	1.53	1	Male	Marker_653717	Scaffold192	619498	619456
622415	2.172	1	Male	Marker_622415	Scaffold244	691258	691217
418501	2.173	1	Male	Marker_418501	Scaffold543	146379	146419
679837	2.174	1	Male	Marker_679837	Scaffold1994	73412	73452
417798	2.444	1	Male	Marker_417798	Scaffold244	495682	495722
599195	4.136	1	Male	Marker_599195	Scaffold1074	111570	111608
357948	4.193	1	Male	Marker_357948	Scaffold9656	7826	7861
644033	10.248	1	Male	Marker_644033	Scaffold964	222491	222455
542410	10.983	1	Male	Marker_542410	Scaffold964	132612	132651
634453	11.376	1	Male	Marker_634453	Scaffold964	94717	94683
371306	17.312	1	Male	Marker_371306	Scaffold780	140882	140913
491120	18.347	1	Male	Marker_491120	Scaffold1190	4114	4073
546305	28.187	1	Male	Marker_546305	Scaffold1117	240964	240923
547413	33.827	1	Male	Marker_547413	Scaffold6933	1062	1097
564604	37.604	1	Male	Marker_564604	Scaffold30160	14	54
587406	42.984	1	Male	Marker_587406	Scaffold1679	107208	107168
541828	43.551	1	Male	Marker_541828	Scaffold623	245660	245699
380573	43.617	1	Male	Marker_380573	Scaffold4013	13374	13395
451634	43.968	1	Male	Marker_451634	Scaffold623	368866	368902
700700	44.452	1	Male	Marker_700700	Scaffold623	378329	378288
547038	45.211	1	Male	Marker_547038	Scaffold329	70096	70054
553415	45.385	1	Male	Marker_553415	Scaffold329	326329	326365
370516	46.052	1	Male	Marker_370516	Scaffold1148	67839	67796
622933	46.163	1	Male	Marker_622933	Scaffold489	867980	867940
636327	46.177	1	Male	Marker_636327	Scaffold123	849816	849858
364106	46.178	1	Male	Marker_364106	Scaffold720	310978	311018
612420	46.232	1	Male	Marker_612420	Scaffold123	935789	935746
491021	46.28	1	Male	Marker_491021	Scaffold1060	373457	373424
446859	46.34	1	Male	Marker_446859	Scaffold305	462707	462665
458830	46.36	1	Male	Marker_458830	Scaffold401	59666	59625
454593	47.699	1	Male	Marker_454593	Scaffold283	241232	241273
740309	49.652	1	Male	Marker_740309	Scaffold386	251587	251633
400023	50.384	1	Male	Marker_400023	Scaffold573	539712	539752
604911	50.587	1	Male	Marker_604911	Scaffold562	111590	111558
44310	51.331	1	Male	Marker_44310	Scaffold573	650738	650778
494060	53.846	1	Male	Marker_494060	Scaffold386	510277	510319
693807	57.659	1	Male	Marker_693807	Scaffold2517	2697	2655
618545	58.541	1	Male	Marker_618545	Scaffold374	556479	556519
359616	61.222	1	Male	Marker_359616	Scaffold4079	223	185
605288	62.241	1	Male	Marker_605288	Scaffold5	1224077	1224041
425173	63.811	1	Male	Marker_425173	Scaffold130	636524	636483
356644	64.172	1	Male	Marker_356644	Scaffold29470	32546	32516
490443	64.246	1	Male	Marker_490443	Scaffold299	198221	198257
556868	64.683	1	Male	Marker_556868	Scaffold130	371112	371147
556815	65.052	1	Male	Marker_556815	Scaffold130	798509	798466
485404	67.428	1	Male	Marker_485404	Scaffold636	314945	314974
542849	67.511	1	Male	Marker_542849	Scaffold7807	29837	29795
458421	67.619	1	Male	Marker_458421	Scaffold2431	41034	41000
704664	67.639	1	Male	Marker_704664	Scaffold636	296004	296043
407857	68.051	1	Male	Marker_407857	Scaffold636	706889	706927
459005	70.441	1	Male	Marker_459005	Scaffold1624	50486	50444
616967	72.854	1	Male	Marker_616967	Scaffold7381	32095	32135
711528	74.056	1	Male	Marker_711528	Scaffold630	588344	588384
495220	74.341	1	Male	Marker_495220	Scaffold5	741539	741513
376903	74.547	1	Male	Marker_376903	Scaffold1300	36485	36527
702907	74.836	1	Male	Marker_702907	Scaffold756	527721	527762
675316	75.093	1	Male	Marker_675316	Scaffold756	394056	394097
681406	75.288	1	Male	Marker_681406	Scaffold234	1057981	1057939
674258	75.426	1	Male	Marker_674258	Scaffold630	297370	297410
625735	75.541	1	Male	Marker_625735	Scaffold702	205998	205955
642796	75.609	1	Male	Marker_642796	Scaffold234	1189147	1189106
486218	75.739	1	Male	Marker_486218	Scaffold1063	70714	70672
506698	75.853	1	Male	Marker_506698	Scaffold234	827447	827406
690102	81.702	1	Male	Marker_690102	Scaffold895	123921	123880
503366	81.727	1	Male	Marker_503366	Scaffold1733	62554	62514
563064	0.08	10	Male	Marker_563064	Scaffold391	42821	42861
461536	0.091	10	Male	Marker_461536	Scaffold391	371874	371834
614289	0.128	10	Male	Marker_614289	Scaffold391	201823	201782
588228	0.198	10	Male	Marker_588228	Scaffold1896	540320	540282
700545	13.251	10	Male	Marker_700545	Scaffold429	296549	296590
640741	13.534	10	Male	Marker_640741	Scaffold429	105439	105481
542156	13.749	10	Male	Marker_542156	Scaffold39	383791	383832
532989	13.77	10	Male	Marker_532989	Scaffold429	289193	289152
360471	13.847	10	Male	Marker_360471	Scaffold429	217141	217107
718975	13.872	10	Male	Marker_718975	Scaffold306	232685	232726
644084	14.174	10	Male	Marker_644084	Scaffold306	199253	199212
490387	14.175	10	Male	Marker_490387	Scaffold39	584494	584452
326825	14.196	10	Male	Marker_326825	Scaffold429	217138	217180
716760	14.504	10	Male	Marker_716760	Scaffold400	241278	241247
684877	14.718	10	Male	Marker_684877	Scaffold1503	151467	151496
376714	14.762	10	Male	Marker_376714	Scaffold39	1035592	1035634
567919	14.837	10	Male	Marker_567919	Scaffold306	159421	159459
473652	14.924	10	Male	Marker_473652	Scaffold400	414756	414796
506963	16.108	10	Male	Marker_506963	Scaffold668	318799	318759
461952	16.27	10	Male	Marker_461952	Scaffold4	858115	858075
390748	16.366	10	Male	Marker_390748	Scaffold198	487565	487528
433578	16.575	10	Male	Marker_433578	Scaffold198	525552	525595
641803	16.736	10	Male	Marker_641803	Scaffold198	379106	379064
458957	16.783	10	Male	Marker_458957	Scaffold4	596580	596617
387052	16.807	10	Male	Marker_387052	Scaffold4	1387409	1387376
554291	16.885	10	Male	Marker_554291	Scaffold668	72304	72262
409934	21.675	10	Male	Marker_409934	Scaffold1859	1944	1900
385681	21.703	10	Male	Marker_385681	Scaffold279	161921	161962
417630	22.03	10	Male	Marker_417630	Scaffold86	1038744	1038777
614549	22.456	10	Male	Marker_614549	Scaffold20528	1275	1311
547795	22.588	10	Male	Marker_547795	Scaffold68	886131	886173
410984	22.825	10	Male	Marker_410984	Scaffold2540	64431	64397
510599	23.159	10	Male	Marker_510599	Scaffold68	942803	942761
752556	23.294	10	Male	Marker_752556	Scaffold1109	2802	2842
718282	23.451	10	Male	Marker_718282	Scaffold1109	24923	24888
748142	23.533	10	Male	Marker_748142	Scaffold277	316164	316205
566589	23.63	10	Male	Marker_566589	Scaffold340	62463	62504
375764	23.819	10	Male	Marker_375764	Scaffold800	53193	53232
665172	23.941	10	Male	Marker_665172	Scaffold68	898194	898234
665601	23.987	10	Male	Marker_665601	Scaffold277	167969	168009
426475	24.068	10	Male	Marker_426475	Scaffold608	287142	287102
420996	24.258	10	Male	Marker_420996	Scaffold403	38461	38502
698407	24.4	10	Male	Marker_698407	Scaffold68	910445	910403
553250	24.539	10	Male	Marker_553250	Scaffold277	321675	321637
374903	28.719	10	Male	Marker_374903	Scaffold404	87813	87855
377099	28.752	10	Male	Marker_377099	Scaffold945	144093	144050
468694	28.819	10	Male	Marker_468694	Scaffold501	326542	326580
619561	28.935	10	Male	Marker_619561	Scaffold501	314783	314823
767801	29.124	10	Male	Marker_767801	Scaffold1891	83616	83655
478311	29.315	10	Male	Marker_478311	Scaffold404	53162	53123
464717	29.744	10	Male	Marker_464717	Scaffold404	233693	233734
708476	29.817	10	Male	Marker_708476	Scaffold945	172793	172765
691805	31.416	10	Male	Marker_691805	Scaffold80	13549	13589
248730	32.436	10	Male	Marker_248730	Scaffold2983	32825	32866
676739	32.499	10	Male	Marker_676739	Scaffold455	504119	504078
576773	32.552	10	Male	Marker_576773	Scaffold455	294524	294483
423157	36.04	10	Male	Marker_423157	Scaffold2934	3344	3385
687607	36.2	10	Male	Marker_687607	Scaffold7	1690524	1690483
429486	36.443	10	Male	Marker_429486	Scaffold6358	2804	2765
552180	36.55	10	Male	Marker_552180	Scaffold2934	55552	55510
612386	36.684	10	Male	Marker_612386	Scaffold2934	5567	5527
580259	36.902	10	Male	Marker_580259	Scaffold6368	11155	11196
658664	40.825	10	Male	Marker_658664	Scaffold890	291071	291114
583020	41.088	10	Male	Marker_583020	Scaffold55	757422	757379
657607	41.159	10	Male	Marker_657607	Scaffold333	643191	643160
433090	41.287	10	Male	Marker_433090	Scaffold333	808108	808068
421113	41.532	10	Male	Marker_421113	Scaffold55	236020	236061
449924	41.782	10	Male	Marker_449924	Scaffold333	449528	449486
709923	41.859	10	Male	Marker_709923	Scaffold333	306910	306869
469948	47.317	10	Male	Marker_469948	Scaffold326	533651	533691
437609	47.541	10	Male	Marker_437609	Scaffold446	147938	147898
733269	47.764	10	Male	Marker_733269	Scaffold996	129198	129222
644314	47.777	10	Male	Marker_644314	Scaffold326	520480	520521
603600	48.745	10	Male	Marker_603600	Scaffold153	532889	532933
508936	51.815	10	Male	Marker_508936	Scaffold946	362709	362667
738408	52.158	10	Male	Marker_738408	Scaffold946	545330	545372
648406	52.37	10	Male	Marker_648406	Scaffold21181	1136	1172
577440	0	11	Male	Marker_577440	Scaffold544	475026	475067
690323	0.182	11	Male	Marker_690323	Scaffold544	654012	653970
398921	0.198	11	Male	Marker_398921	Scaffold544	607476	607516
583148	0.407	11	Male	Marker_583148	Scaffold544	205857	205816
533006	0.694	11	Male	Marker_533006	Scaffold544	567304	567347
634972	2.766	11	Male	Marker_634972	Scaffold3038	103536	103574
711254	3.072	11	Male	Marker_711254	Scaffold571	143601	143562
450137	3.104	11	Male	Marker_450137	Scaffold184	771390	771350
602382	3.132	11	Male	Marker_602382	Scaffold184	754198	754239
400141	3.205	11	Male	Marker_400141	Scaffold3038	108951	108991
640759	3.649	11	Male	Marker_640759	Scaffold571	269915	269956
731592	3.678	11	Male	Marker_731592	Scaffold413	258124	258084
627435	4.459	11	Male	Marker_627435	Scaffold107	271276	271317
414746	4.517	11	Male	Marker_414746	Scaffold107	437193	437230
512984	4.857	11	Male	Marker_512984	Scaffold571	275384	275343
602816	8.496	11	Male	Marker_602816	Scaffold2417	39538	39569
649746	8.504	11	Male	Marker_649746	Scaffold232	71754	71785
690156	8.535	11	Male	Marker_690156	Scaffold1004	147872	147911
405215	8.599	11	Male	Marker_405215	Scaffold1	614103	614064
465587	8.818	11	Male	Marker_465587	Scaffold315	308925	308953
635741	8.85	11	Male	Marker_635741	Scaffold2026	134712	134753
382349	8.874	11	Male	Marker_382349	Scaffold232	34932	34968
460972	8.96	11	Male	Marker_460972	Scaffold1345	34495	34535
397544	8.96	11	Male	Marker_397544	Scaffold182	543941	543982
353701	10.372	11	Male	Marker_353701	Scaffold5395	24962	24922
684219	11.163	11	Male	Marker_684219	Scaffold182	244127	244094
480416	13.339	11	Male	Marker_480416	Scaffold110	925165	925196
451819	13.343	11	Male	Marker_451819	Scaffold296	315975	315943
447559	13.349	11	Male	Marker_447559	Scaffold114	906099	906057
464320	13.359	11	Male	Marker_464320	Scaffold114	921937	921899
140785	13.478	11	Male	Marker_140785	Scaffold24165	24	65
617972	13.48	11	Male	Marker_617972	Scaffold490	66838	66880
498250	13.482	11	Male	Marker_498250	Scaffold166	576047	576012
459668	13.489	11	Male	Marker_459668	Scaffold296	382211	382177
519269	13.49	11	Male	Marker_519269	Scaffold56	727465	727502
423162	13.492	11	Male	Marker_423162	Scaffold3538	6182	6139
650138	13.522	11	Male	Marker_650138	Scaffold114	846067	846108
498405	13.534	11	Male	Marker_498405	Scaffold114	499268	499308
537732	13.547	11	Male	Marker_537732	Scaffold166	489905	489864
480003	13.584	11	Male	Marker_480003	Scaffold114	77676	77716
618392	15.771	11	Male	Marker_618392	Scaffold1301	274859	274886
415051	16.517	11	Male	Marker_415051	Scaffold303	199863	199823
501424	16.611	11	Male	Marker_501424	Scaffold899	206741	206784
436997	16.625	11	Male	Marker_436997	Scaffold1301	142758	142800
752463	16.928	11	Male	Marker_752463	Scaffold303	144265	144223
514644	17.074	11	Male	Marker_514644	Scaffold899	361473	361438
436793	17.66	11	Male	Marker_436793	Scaffold899	360971	361012
548044	17.754	11	Male	Marker_548044	Scaffold899	127873	127914
446346	18.362	11	Male	Marker_446346	Scaffold125	447874	447911
696947	18.381	11	Male	Marker_696947	Scaffold125	358081	358049
462440	18.484	11	Male	Marker_462440	Scaffold2834	20944	20984
669099	18.532	11	Male	Marker_669099	Scaffold995	143190	143149
378765	18.594	11	Male	Marker_378765	Scaffold701	49790	49750
750422	19.062	11	Male	Marker_750422	Scaffold125	303812	303855
502424	19.077	11	Male	Marker_502424	Scaffold1924	76204	76246
639626	19.118	11	Male	Marker_639626	Scaffold5199	21473	21513
513009	19.165	11	Male	Marker_513009	Scaffold534	166428	166469
764491	19.175	11	Male	Marker_764491	Scaffold1920	16849	16824
660634	19.205	11	Male	Marker_660634	Scaffold292	413832	413857
542073	19.248	11	Male	Marker_542073	Scaffold534	8104	8145
398491	21.384	11	Male	Marker_398491	Scaffold43	448739	448699
558551	0.089	12	Male	Marker_558551	Scaffold233	480427	480467
438784	0.658	12	Male	Marker_438784	Scaffold1355	20087	20047
619192	0.68	12	Male	Marker_619192	Scaffold1877	59888	59851
472854	7.567	12	Male	Marker_472854	Scaffold13249	337	377
418139	8.303	12	Male	Marker_418139	Scaffold1556	19380	19339
466303	23.364	12	Male	Marker_466303	Scaffold784	64957	64917
424099	23.547	12	Male	Marker_424099	Scaffold297	249268	249228
577211	24.011	12	Male	Marker_577211	Scaffold9	459800	459777
461638	24.081	12	Male	Marker_461638	Scaffold1619	17314	17357
634109	24.872	12	Male	Marker_634109	Scaffold949	16451	16491
698320	24.952	12	Male	Marker_698320	Scaffold793	263797	263831
511323	24.957	12	Male	Marker_511323	Scaffold3817	100362	100332
453923	25.1	12	Male	Marker_453923	Scaffold757	153637	153595
515106	25.155	12	Male	Marker_515106	Scaffold2342	60793	60827
382889	25.226	12	Male	Marker_382889	Scaffold793	295113	295071
449838	25.253	12	Male	Marker_449838	Scaffold1057	30183	30206
589500	25.254	12	Male	Marker_589500	Scaffold525	311187	311228
534206	25.392	12	Male	Marker_534206	Scaffold582	13327	13288
448878	25.983	12	Male	Marker_448878	Scaffold725	233413	233447
559573	26.837	12	Male	Marker_559573	Scaffold2162	197997	198031
414151	26.948	12	Male	Marker_414151	Scaffold676	233981	234020
78555	26.991	12	Male	Marker_78555	Scaffold1305	156692	156652
589639	27.27	12	Male	Marker_589639	Scaffold741	298785	298828
652619	29.164	12	Male	Marker_652619	Scaffold441	199938	199897
495751	34.693	12	Male	Marker_495751	Scaffold876	84252	84212
545812	34.741	12	Male	Marker_545812	Scaffold910	215452	215409
594784	38.575	12	Male	Marker_594784	Scaffold3126	10933	10975
482318	38.675	12	Male	Marker_482318	Scaffold2410	57513	57473
555701	39.152	12	Male	Marker_555701	Scaffold984	186319	186283
419649	39.435	12	Male	Marker_419649	Scaffold3372	14891	14921
361978	40.776	12	Male	Marker_361978	Scaffold18486	644	687
528230	42.349	12	Male	Marker_528230	Scaffold546	164055	164096
423861	43.787	12	Male	Marker_423861	Scaffold604	106094	106052
646129	45.488	12	Male	Marker_646129	Scaffold2268	126399	126434
714499	53.033	12	Male	Marker_714499	Scaffold319	43574	43532
524150	53.515	12	Male	Marker_524150	Scaffold1337	88585	88626
565089	53.539	12	Male	Marker_565089	Scaffold261	282447	282488
457115	54.545	12	Male	Marker_457115	Scaffold1506	274531	274499
605461	0	13	Male	Marker_605461	Scaffold684	106334	106293
500227	2.811	13	Male	Marker_500227	Scaffold24	785202	785160
471438	2.841	13	Male	Marker_471438	Scaffold1150	400586	400551
665707	2.97	13	Male	Marker_665707	Scaffold2420	18821	18859
557032	3.022	13	Male	Marker_557032	Scaffold5850	3410	3372
364088	3.066	13	Male	Marker_364088	Scaffold1043	158542	158573
658625	3.335	13	Male	Marker_658625	Scaffold834	130942	130902
515990	3.647	13	Male	Marker_515990	Scaffold3371	1341	1303
380543	3.703	13	Male	Marker_380543	Scaffold111	159492	159450
498977	12.032	13	Male	Marker_498977	Scaffold3429	8646	8686
607843	14.073	13	Male	Marker_607843	Scaffold2272	46900	46864
573427	15.981	13	Male	Marker_573427	Scaffold1134	188496	188537
414338	16.1	13	Male	Marker_414338	Scaffold167	442154	442112
465154	16.559	13	Male	Marker_465154	Scaffold602	156083	156124
389922	16.808	13	Male	Marker_389922	Scaffold167	351141	351100
489290	17.029	13	Male	Marker_489290	Scaffold167	455349	455385
373391	19.014	13	Male	Marker_373391	Scaffold2452	22067	22107
575915	21.878	13	Male	Marker_575915	Scaffold1478	112089	112129
577447	21.906	13	Male	Marker_577447	Scaffold109	180848	180807
535964	22.02	13	Male	Marker_535964	Scaffold987	143171	143128
384028	22.091	13	Male	Marker_384028	Scaffold389	168865	168900
673062	22.134	13	Male	Marker_673062	Scaffold15484	509	472
531174	22.14	13	Male	Marker_531174	Scaffold2623	3414	3373
658771	22.505	13	Male	Marker_658771	Scaffold1606	54572	54539
727348	22.542	13	Male	Marker_727348	Scaffold1435	68636	68673
433303	22.558	13	Male	Marker_433303	Scaffold109	108435	108396
361416	0	14	Male	Marker_361416	Scaffold163	693616	693657
667213	0.345	14	Male	Marker_667213	Scaffold163	626489	626530
636650	1.376	14	Male	Marker_636650	Scaffold356	329664	329706
472993	2.069	14	Male	Marker_472993	Scaffold356	417349	417308
561642	2.096	14	Male	Marker_561642	Scaffold356	144599	144557
660066	2.155	14	Male	Marker_660066	Scaffold2029	89266	89225
564534	2.198	14	Male	Marker_564534	Scaffold71	721332	721373
721261	2.599	14	Male	Marker_721261	Scaffold4043	23302	23342
722046	2.634	14	Male	Marker_722046	Scaffold195	402689	402729
669625	2.82	14	Male	Marker_669625	Scaffold739	271794	271753
607980	3.133	14	Male	Marker_607980	Scaffold356	32883	32923
515008	3.356	14	Male	Marker_515008	Scaffold356	70164	70126
661461	3.616	14	Male	Marker_661461	Scaffold256	421048	421087
654912	3.661	14	Male	Marker_654912	Scaffold739	260142	260182
509440	3.672	14	Male	Marker_509440	Scaffold341	177548	177586
412980	3.726	14	Male	Marker_412980	Scaffold438	361561	361520
271746	3.738	14	Male	Marker_271746	Scaffold95	206037	205997
376297	3.747	14	Male	Marker_376297	Scaffold341	181281	181320
402471	3.783	14	Male	Marker_402471	Scaffold256	146275	146309
585027	3.843	14	Male	Marker_585027	Scaffold438	250108	250148
392276	3.855	14	Male	Marker_392276	Scaffold5206	11073	11030
721105	3.857	14	Male	Marker_721105	Scaffold10606	649	608
643351	4.063	14	Male	Marker_643351	Scaffold71	627183	627142
460986	4.496	14	Male	Marker_460986	Scaffold1353	144901	144860
360627	4.663	14	Male	Marker_360627	Scaffold1726	104299	104258
708589	5.243	14	Male	Marker_708589	Scaffold20	1102114	1102076
478974	5.321	14	Male	Marker_478974	Scaffold260	442155	442113
379553	5.329	14	Male	Marker_379553	Scaffold260	658678	658719
580426	5.406	14	Male	Marker_580426	Scaffold1181	82207	82164
450872	5.456	14	Male	Marker_450872	Scaffold20484	15868	15825
700520	5.67	14	Male	Marker_700520	Scaffold1761	179856	179893
618896	7.973	14	Male	Marker_618896	Scaffold2440	88480	88522
520950	8.001	14	Male	Marker_520950	Scaffold901	410515	410474
585983	8.491	14	Male	Marker_585983	Scaffold140	463430	463470
507875	13.937	14	Male	Marker_507875	Scaffold1015	154858	154901
473271	14.218	14	Male	Marker_473271	Scaffold1015	165664	165620
668246	15.215	14	Male	Marker_668246	Scaffold1015	219897	219937
623446	17.973	14	Male	Marker_623446	Scaffold468	241082	241053
575384	18.161	14	Male	Marker_575384	Scaffold4459	8348	8318
606844	18.972	14	Male	Marker_606844	Scaffold311	15720	15764
728795	19.013	14	Male	Marker_728795	Scaffold1948	49239	49198
424226	19.331	14	Male	Marker_424226	Scaffold417	264084	264044
394059	19.393	14	Male	Marker_394059	Scaffold1253	351874	351915
464460	19.474	14	Male	Marker_464460	Scaffold225	910710	910747
417946	19.522	14	Male	Marker_417946	Scaffold598	229722	229762
467841	19.627	14	Male	Marker_467841	Scaffold417	214447	214487
434012	19.633	14	Male	Marker_434012	Scaffold1073	219620	219580
468165	19.659	14	Male	Marker_468165	Scaffold1570	143296	143256
440373	19.677	14	Male	Marker_440373	Scaffold15618	5450	5416
534398	19.843	14	Male	Marker_534398	Scaffold1253	217463	217503
377520	19.953	14	Male	Marker_377520	Scaffold598	354946	354905
559973	20.22	14	Male	Marker_559973	Scaffold25	39276	39316
725605	20.232	14	Male	Marker_725605	Scaffold2100	54654	54613
566684	20.354	14	Male	Marker_566684	Scaffold2263	87884	87842
567647	20.63	14	Male	Marker_567647	Scaffold25	674144	674176
740782	20.875	14	Male	Marker_740782	Scaffold25	618768	618736
485842	20.941	14	Male	Marker_485842	Scaffold25	721258	721218
742981	20.966	14	Male	Marker_742981	Scaffold45	1003785	1003826
682214	20.975	14	Male	Marker_682214	Scaffold25	991807	991842
433596	21.06	14	Male	Marker_433596	Scaffold45	986953	986988
638310	21.368	14	Male	Marker_638310	Scaffold2904	41830	41798
712417	21.867	14	Male	Marker_712417	Scaffold5168	21133	21102
513454	22.342	14	Male	Marker_513454	Scaffold1819	25716	25676
429578	22.396	14	Male	Marker_429578	Scaffold241	491208	491165
594996	22.5	14	Male	Marker_594996	Scaffold345	874084	874044
519454	22.636	14	Male	Marker_519454	Scaffold3132	128818	128777
699091	22.673	14	Male	Marker_699091	Scaffold1957	275144	275107
491790	22.706	14	Male	Marker_491790	Scaffold1015	264239	264263
593896	26.789	14	Male	Marker_593896	Scaffold344	662906	662866
713265	26.902	14	Male	Marker_713265	Scaffold344	53156	53116
552788	35.474	14	Male	Marker_552788	Scaffold19	1242582	1242623
474887	36.25	14	Male	Marker_474887	Scaffold876	458516	458479
72860	36.895	14	Male	Marker_72860	Scaffold19	990656	990699
457027	37.197	14	Male	Marker_457027	Scaffold140	426782	426746
712530	37.587	14	Male	Marker_712530	Scaffold1373	125242	125202
548394	38.115	14	Male	Marker_548394	Scaffold1207	314837	314797
551351	38.619	14	Male	Marker_551351	Scaffold266	630476	630519
427750	39.033	14	Male	Marker_427750	Scaffold1545	269359	269399
595601	41.314	14	Male	Marker_595601	Scaffold1002	311499	311456
516890	41.836	14	Male	Marker_516890	Scaffold161	295387	295349
638762	41.868	14	Male	Marker_638762	Scaffold459	82851	82883
570059	41.899	14	Male	Marker_570059	Scaffold1002	284738	284694
379461	41.947	14	Male	Marker_379461	Scaffold161	566545	566504
492275	42.262	14	Male	Marker_492275	Scaffold161	754604	754562
581876	42.303	14	Male	Marker_581876	Scaffold1089	124521	124480
510831	42.389	14	Male	Marker_510831	Scaffold1002	122831	122871
451024	0	15	Male	Marker_451024	Scaffold1773	152647	152686
638632	0.141	15	Male	Marker_638632	Scaffold2804	9902	9942
699167	1.443	15	Male	Marker_699167	Scaffold16961	637	678
622154	1.563	15	Male	Marker_622154	Scaffold2149	147566	147525
673016	1.975	15	Male	Marker_673016	Scaffold1470	114588	114628
726400	2.002	15	Male	Marker_726400	Scaffold104	161836	161876
294911	2.088	15	Male	Marker_294911	Scaffold549	269996	269962
237703	2.318	15	Male	Marker_237703	Scaffold1988	20235	20275
699318	2.361	15	Male	Marker_699318	Scaffold3312	38988	38945
582924	2.386	15	Male	Marker_582924	Scaffold65	80039	80066
457979	2.585	15	Male	Marker_457979	Scaffold112	411544	411502
365963	7.479	15	Male	Marker_365963	Scaffold1367	30341	30300
735916	7.556	15	Male	Marker_735916	Scaffold222	532158	532119
473762	7.811	15	Male	Marker_473762	Scaffold713	268324	268365
382541	7.871	15	Male	Marker_382541	Scaffold222	464080	464039
606526	8.393	15	Male	Marker_606526	Scaffold1367	85496	85458
431181	8.419	15	Male	Marker_431181	Scaffold4677	5949	5972
572473	8.682	15	Male	Marker_572473	Scaffold222	461420	461461
390707	8.82	15	Male	Marker_390707	Scaffold553	273005	272965
538761	9.279	15	Male	Marker_538761	Scaffold8	1119170	1119210
421307	14.536	15	Male	Marker_421307	Scaffold1850	132662	132701
384910	15.094	15	Male	Marker_384910	Scaffold6854	2702	2742
526209	18.486	15	Male	Marker_526209	Scaffold46	64887	64851
384063	18.911	15	Male	Marker_384063	Scaffold871	67657	67699
560809	18.945	15	Male	Marker_560809	Scaffold906	277931	277890
571991	18.945	15	Male	Marker_571991	Scaffold967	252992	253032
570676	19.018	15	Male	Marker_570676	Scaffold906	278418	278382
696461	19.035	15	Male	Marker_696461	Scaffold903	79240	79198
478160	19.219	15	Male	Marker_478160	Scaffold967	252995	252960
531790	19.242	15	Male	Marker_531790	Scaffold1119	203065	203106
536922	19.506	15	Male	Marker_536922	Scaffold4034	17202	17238
496270	21.849	15	Male	Marker_496270	Scaffold1333	64216	64176
495133	23.991	15	Male	Marker_495133	Scaffold229	655445	655485
658305	24.021	15	Male	Marker_658305	Scaffold1468	125991	125970
631935	25.127	15	Male	Marker_631935	Scaffold1427	40102	40143
366401	25.361	15	Male	Marker_366401	Scaffold32	651816	651776
487416	0	16	Male	Marker_487416	Scaffold2785	74887	74926
206685	0.342	16	Male	Marker_206685	Scaffold196	381348	381387
387552	0.615	16	Male	Marker_387552	Scaffold30261	175	143
559742	1.002	16	Male	Marker_559742	Scaffold2978	75740	75773
522854	1.194	16	Male	Marker_522854	Scaffold715	40414	40456
728487	1.446	16	Male	Marker_728487	Scaffold169	627791	627821
442464	1.502	16	Male	Marker_442464	Scaffold196	440422	440463
384899	10.732	16	Male	Marker_384899	Scaffold67	157996	157953
616349	12.815	16	Male	Marker_616349	Scaffold67	895987	895944
459913	13.238	16	Male	Marker_459913	Scaffold67	580292	580334
722946	13.689	16	Male	Marker_722946	Scaffold621	449403	449370
370377	14.288	16	Male	Marker_370377	Scaffold826	148117	148084
384752	16.046	16	Male	Marker_384752	Scaffold67	426695	426739
412099	26.263	16	Male	Marker_412099	Scaffold1584	111508	111467
628076	29.92	16	Male	Marker_628076	Scaffold528	407712	407669
410817	30.077	16	Male	Marker_410817	Scaffold3598	41795	41754
462278	31.444	16	Male	Marker_462278	Scaffold1482	114571	114612
473865	32.429	16	Male	Marker_473865	Scaffold698	149219	149180
573638	32.484	16	Male	Marker_573638	Scaffold818	165764	165800
364886	33.519	16	Male	Marker_364886	Scaffold682	35462	35502
654277	33.531	16	Male	Marker_654277	Scaffold3282	14596	14554
571430	33.594	16	Male	Marker_571430	Scaffold64	591107	591149
465030	33.596	16	Male	Marker_465030	Scaffold818	143793	143835
557795	33.623	16	Male	Marker_557795	Scaffold64	594991	595033
623106	33.632	16	Male	Marker_623106	Scaffold5415	8904	8861
735818	33.641	16	Male	Marker_735818	Scaffold3263	47527	47567
374380	33.679	16	Male	Marker_374380	Scaffold652	202362	202403
639381	33.688	16	Male	Marker_639381	Scaffold1620	166114	166090
647138	33.705	16	Male	Marker_647138	Scaffold577	456289	456250
533594	33.715	16	Male	Marker_533594	Scaffold7137	1492	1528
711439	33.728	16	Male	Marker_711439	Scaffold963	123837	123797
439890	33.73	16	Male	Marker_439890	Scaffold1440	125870	125912
413058	33.73	16	Male	Marker_413058	Scaffold5339	5218	5197
356187	33.731	16	Male	Marker_356187	Scaffold3528	22094	22117
535296	33.733	16	Male	Marker_535296	Scaffold92	303590	303631
601655	33.735	16	Male	Marker_601655	Scaffold682	99087	99129
492044	33.736	16	Male	Marker_492044	Scaffold2167	40438	40397
523096	33.737	16	Male	Marker_523096	Scaffold682	160796	160755
546400	33.739	16	Male	Marker_546400	Scaffold2594	35914	35875
460497	33.748	16	Male	Marker_460497	Scaffold64	384449	384420
685108	33.751	16	Male	Marker_685108	Scaffold3110	29395	29430
375199	33.764	16	Male	Marker_375199	Scaffold527	235848	235888
674164	33.818	16	Male	Marker_674164	Scaffold2167	104806	104765
620214	34.432	16	Male	Marker_620214	Scaffold27085	362	391
529244	34.721	16	Male	Marker_529244	Scaffold362	471488	471524
491618	35.112	16	Male	Marker_491618	Scaffold11474	98	140
584032	35.491	16	Male	Marker_584032	Scaffold212	358725	358769
518207	36.362	16	Male	Marker_518207	Scaffold2051	31711	31751
468414	0.014	17	Male	Marker_468414	Scaffold26572	649	676
530373	6.512	17	Male	Marker_530373	Scaffold77	167608	167648
530048	6.587	17	Male	Marker_530048	Scaffold2444	130580	130617
511963	6.651	17	Male	Marker_511963	Scaffold77	356650	356609
505317	7.007	17	Male	Marker_505317	Scaffold1238	130392	130352
759614	7.17	17	Male	Marker_759614	Scaffold119	140861	140818
499014	7.239	17	Male	Marker_499014	Scaffold952	96147	96107
474910	7.288	17	Male	Marker_474910	Scaffold952	100923	100962
496288	8.99	17	Male	Marker_496288	Scaffold832	127961	127938
438851	10.695	17	Male	Marker_438851	Scaffold1269	205997	205976
411279	10.75	17	Male	Marker_411279	Scaffold29332	45760	45719
648579	11.23	17	Male	Marker_648579	Scaffold2526	11684	11724
707976	29.176	17	Male	Marker_707976	Scaffold246	287383	287343
382258	29.306	17	Male	Marker_382258	Scaffold478	179853	179894
481911	29.355	17	Male	Marker_481911	Scaffold478	180524	180488
552978	29.371	17	Male	Marker_552978	Scaffold478	323264	323232
520170	29.485	17	Male	Marker_520170	Scaffold478	528458	528498
716502	29.727	17	Male	Marker_716502	Scaffold89	465912	465872
387690	30.489	17	Male	Marker_387690	Scaffold237	348770	348810
681043	31.569	17	Male	Marker_681043	Scaffold267	219273	219315
577863	36.18	17	Male	Marker_577863	Scaffold365	486040	486081
434577	36.438	17	Male	Marker_434577	Scaffold365	399998	400039
636667	36.525	17	Male	Marker_636667	Scaffold113	507603	507560
611899	36.584	17	Male	Marker_611899	Scaffold365	514732	514771
519524	36.72	17	Male	Marker_519524	Scaffold113	252092	252132
758349	36.749	17	Male	Marker_758349	Scaffold1354	155450	155412
396474	36.959	17	Male	Marker_396474	Scaffold6077	3125	3167
523645	37.14	17	Male	Marker_523645	Scaffold10	496195	496234
436845	37.271	17	Male	Marker_436845	Scaffold10	564493	564453
620360	37.331	17	Male	Marker_620360	Scaffold8691	8414	8374
493963	37.376	17	Male	Marker_493963	Scaffold548	139999	140039
693083	37.389	17	Male	Marker_693083	Scaffold1557	32645	32605
545317	37.664	17	Male	Marker_545317	Scaffold548	140002	139962
428582	39	17	Male	Marker_428582	Scaffold298	393472	393439
686472	41.641	17	Male	Marker_686472	Scaffold853	220288	220329
431869	41.797	17	Male	Marker_431869	Scaffold1066	95355	95397
400278	41.808	17	Male	Marker_400278	Scaffold541	412787	412826
536851	42.542	17	Male	Marker_536851	Scaffold541	244973	245012
720695	42.565	17	Male	Marker_720695	Scaffold4691	30650	30610
532467	43.091	17	Male	Marker_532467	Scaffold607	126165	126126
546972	43.29	17	Male	Marker_546972	Scaffold3746	17463	17505
703592	43.295	17	Male	Marker_703592	Scaffold4691	39507	39467
413350	43.342	17	Male	Marker_413350	Scaffold1411	234786	234826
730003	43.516	17	Male	Marker_730003	Scaffold14	939395	939435
476362	48.086	17	Male	Marker_476362	Scaffold53	547914	547874
490414	49.088	17	Male	Marker_490414	Scaffold2702	15157	15199
636346	50.326	17	Male	Marker_636346	Scaffold53	326454	326411
684707	50.481	17	Male	Marker_684707	Scaffold24294	957	926
376601	50.9	17	Male	Marker_376601	Scaffold445	440111	440068
682418	0	18	Male	Marker_682418	Scaffold15573	4028	4071
529993	1.277	18	Male	Marker_529993	Scaffold2416	32188	32150
537950	1.725	18	Male	Marker_537950	Scaffold980	342292	342251
398793	2.733	18	Male	Marker_398793	Scaffold1128	72327	72359
396699	2.854	18	Male	Marker_396699	Scaffold774	396815	396858
656745	3.643	18	Male	Marker_656745	Scaffold2525	46403	46443
631449	3.778	18	Male	Marker_631449	Scaffold487	120281	120320
713004	11.895	18	Male	Marker_713004	Scaffold449	344114	344139
599751	12.333	18	Male	Marker_599751	Scaffold6	1181825	1181866
525961	12.337	18	Male	Marker_525961	Scaffold22	1209529	1209571
488797	12.473	18	Male	Marker_488797	Scaffold1645	31612	31572
620512	12.548	18	Male	Marker_620512	Scaffold2872	12306	12346
707325	12.772	18	Male	Marker_707325	Scaffold1316	151505	151545
442822	12.797	18	Male	Marker_442822	Scaffold559	257060	257100
541769	12.821	18	Male	Marker_541769	Scaffold239	261002	261039
529180	12.871	18	Male	Marker_529180	Scaffold419	203201	203237
443761	12.88	18	Male	Marker_443761	Scaffold3310	12032	12075
646289	12.975	18	Male	Marker_646289	Scaffold2505	64565	64524
583750	12.982	18	Male	Marker_583750	Scaffold3730	45043	45003
697445	13.142	18	Male	Marker_697445	Scaffold2105	55307	55348
642088	14.441	18	Male	Marker_642088	Scaffold12418	85	126
664557	15.259	18	Male	Marker_664557	Scaffold521	569771	569815
620089	15.928	18	Male	Marker_620089	Scaffold521	194999	194967
591856	15.967	18	Male	Marker_591856	Scaffold521	483480	483515
651067	17.188	18	Male	Marker_651067	Scaffold30	127576	127535
441891	17.732	18	Male	Marker_441891	Scaffold930	54377	54338
366680	18.32	18	Male	Marker_366680	Scaffold930	25311	25353
733691	19.342	18	Male	Marker_733691	Scaffold7148	586	546
672082	24.461	18	Male	Marker_672082	Scaffold1224	222347	222305
748242	24.492	18	Male	Marker_748242	Scaffold1224	222344	222383
595844	25.706	18	Male	Marker_595844	Scaffold407	49738	49696
536366	26.534	18	Male	Marker_536366	Scaffold28025	341	299
521302	27.19	18	Male	Marker_521302	Scaffold1136	221611	221641
451531	27.595	18	Male	Marker_451531	Scaffold1242	125758	125799
524116	27.637	18	Male	Marker_524116	Scaffold499	183314	183275
608009	27.944	18	Male	Marker_608009	Scaffold499	112268	112227
558653	27.99	18	Male	Marker_558653	Scaffold13	881578	881621
673375	28.01	18	Male	Marker_673375	Scaffold13	1273450	1273410
589450	28.087	18	Male	Marker_589450	Scaffold1260	222906	222862
446508	28.593	18	Male	Marker_446508	Scaffold2971	3220	3183
513813	29.564	18	Male	Marker_513813	Scaffold625	287422	287382
550535	29.638	18	Male	Marker_550535	Scaffold1528	78444	78402
382078	29.745	18	Male	Marker_382078	Scaffold1483	104649	104609
371673	29.877	18	Male	Marker_371673	Scaffold1483	134080	134123
397945	30.008	18	Male	Marker_397945	Scaffold405	90116	90149
547942	30.133	18	Male	Marker_547942	Scaffold1075	63829	63869
623927	30.401	18	Male	Marker_623927	Scaffold620	385796	385836
584557	31.058	18	Male	Marker_584557	Scaffold813	294731	294690
545466	31.139	18	Male	Marker_545466	Scaffold5148	6209	6238
502704	31.251	18	Male	Marker_502704	Scaffold1399	132195	132237
405458	31.302	18	Male	Marker_405458	Scaffold217	353114	353071
519802	31.376	18	Male	Marker_519802	Scaffold101	757328	757288
628435	31.419	18	Male	Marker_628435	Scaffold2170	28084	28042
747080	31.96	18	Male	Marker_747080	Scaffold3693	25937	25899
711735	37.663	18	Male	Marker_711735	Scaffold426	171633	171594
381180	38.196	18	Male	Marker_381180	Scaffold1096	98069	98030
366703	0.144	19	Male	Marker_366703	Scaffold2153	40880	40839
626671	0.289	19	Male	Marker_626671	Scaffold50	931036	931079
596099	0.402	19	Male	Marker_596099	Scaffold1349	64651	64611
466835	0.464	19	Male	Marker_466835	Scaffold2153	50156	50192
617494	0.515	19	Male	Marker_617494	Scaffold50	631921	631880
717764	0.524	19	Male	Marker_717764	Scaffold5670	2034	2071
[truncated: 521 more rows]
